1 Tuning the potency and therapeutic window of ImmTAC molecules  
2 by affinity modulation

3 Authors:

4 Ian B Robertson<sup>1</sup>, Rachel Mulvaney<sup>1</sup>, Nele Dieckmann<sup>1</sup>, Alessio Vantellini<sup>1</sup>, Martina Canestraro<sup>1</sup>,  
5 Francesca Amicarella<sup>1</sup>, Ronan O'Dwyer<sup>1</sup>, David K. Cole<sup>1</sup>, Stephen Harper<sup>1</sup>, Omer Dushek<sup>2</sup>, and Peter  
6 Kirk<sup>1</sup>,

7 <sup>1</sup> Immunocore Limited, 92 Park Drive, Milton Park, Abingdon, Oxon, OX14 4RY, UK,

8 <sup>2</sup> Sir William Dunn School of Pathology, University of Oxford, South Parks Road, Oxford, OX1  
9 3RE, UK,

10

11 Correspondence should be addressed to Peter Kirk ([peter.kirk@immunocore.com](mailto:peter.kirk@immunocore.com)) and Ian Robertson  
12 ([ian.robertson@immunocore.com](mailto:ian.robertson@immunocore.com))

13 Work carried out in Immunocore LTD, Abingdon, Oxfordshire, UK

14 Corresponding author's address, telephone, fax, and email (email address required): Immunocore  
15 Limited, 92 Park Drive, Milton Park, Abingdon, Oxon, OX14 4RY, UK,  
16 E: [peter.kirk@immunocore.com](mailto:peter.kirk@immunocore.com), [ian.robertson@immunocore.com](mailto:ian.robertson@immunocore.com)

17 Short title of 50 characters or less, including spaces: **Optimising ImmTAC CD3 binding kinetics.**

18

## 19 Abstract

20 T cell engaging bispecifics have great clinical potential for the treatment of cancer and infectious  
21 diseases. The binding affinity and kinetics of a bispecific molecule for both target and T cell CD3  
22 have substantial effects on potency and specificity, but the rules governing these relationships are not  
23 fully understood. Using ImmTAC (Immune mobilizing monoclonal TCRs Against Cancer) molecules  
24 as a model, we explored the impact of altering affinity for target and CD3 on the potency and  
25 specificity of the re-directed T cell response. This class of bispecifics, exemplified by tebentafusp  
26 which has recently shown survival benefit in a randomized phase 3 clinical trial<sup>1</sup>, bind specific target  
27 peptides presented by human leukocyte antigen (HLA) on the cell surface *via* an affinity-enhanced T  
28 cell receptor and can redirect T cell activation with an anti-CD3 effector moiety. The data reveal that  
29 combining a strong affinity TCR with an intermediate affinity anti-CD3 results in optimal T cell  
30 activation, while strong affinity of both targeting and effector domains significantly reduces efficacy.  
31 Moreover, by optimising the affinity of both parts of the molecule, it is possible to improve the  
32 therapeutic window. These results could be effectively modelled based on kinetic proof-reading with  
33 limited signalling. This model explained the experimental observation that strong binding at both ends  
34 of the molecules leads to reduced activity, through very stable target-bispecific-effector complexes  
35 leading to CD3 entering a non-signalling dark-state. These findings have important implications for  
36 the design of anti-CD3 based bispecifics with optimal biophysical parameters for both activity and  
37 specificity.

## 38 Introduction

39 T cells are highly potent components of the adaptive immune system that, because of their ability to  
40 directly kill aberrant cells, have been recently targeted in several immunotherapy approaches for both  
41 cancer and infectious diseases. Target recognition by T cells is governed by the clonally expressed T  
42 cell receptor (TCR), which can initiate T cell activation upon binding to a cognate peptide-human  
43 leukocyte antigen (pHLA) complex, leading to immune synapse formation, phosphorylation of the  
44 CD3 signalling complex and downstream signalling.<sup>2-5</sup> Importantly, T cells are highly sensitive, and  
45 can be activated by very low numbers of cognate pHLA (in the 10s per cell).<sup>4,6,7</sup> Despite their  
46 exquisite sensitivity for antigen, TCRs bind to pHLA complex with weak affinity ( $K_{DS}$  in the low  $\mu\text{M}$   
47 range) and fast kinetics (half-life in seconds).<sup>8</sup> T cells discriminate between different pHLAs on the  
48 basis of the duration of their interaction with the TCR,<sup>9</sup> a property partly explained by the kinetic  
49 proofreading model,<sup>10</sup> whereby the complex of pHLA and TCR must endure for long enough to  
50 initiate productive signalling.

51 ImmTAC (Immune mobilizing monoclonal TCRs Against Cancer) molecules have been developed  
52 utilising affinity-enhanced TCRs with high specificity towards target pHLA antigens. By forming  
53 bridging interactions between pHLA on target cells, and the CD3 signalling complex on the surface of  
54 T cells, ImmTAC molecules can drive formation of an immune synapse<sup>11,12</sup> which can mimic the  
55 ability of T cells to recognise pHLA (Figure 1A).<sup>13</sup> The affinity of the anti-CD3 effector moiety is  
56 among the parameters that are likely to have a substantial effect on T cell redirection by bispecific T  
57 cell engagers, but there have been few studies systematically characterizing this effect across a broad  
58 range of affinities, or relating it to current models of T cell activation. Several studies have  
59 demonstrated that T cells respond best when they are stimulated by receptors or bispecific molecules  
60 with certain optimal affinities and kinetics, often preferring fast on-rate interactions over those with  
61 slow dissociation rates<sup>14</sup>. The detailed mechanisms behind this preference have not been completely  
62 elucidated, but several negative feedback mechanisms, such as phosphorylation by inhibitory Src  
63 family kinases<sup>1</sup> and recruitment of specific phosphatases<sup>3</sup>, are candidates for converting the TCR-CD3  
64 complex to a signalling-impotent dark-state after a prolonged period of activation<sup>15</sup>.

65 Here, we used ImmTAC molecules as a model system to investigate the effect of modulating affinity  
66 for both target and CD3 on the potency and specificity of the redirected T cell response. By modifying  
67 the peptide ligand presented by HLA, we were able to use the same ImmTAC molecule to test a range  
68 of TCR affinities from  $\mu\text{M}$  to  $\text{pM}$ . Generation of a similar affinity range for the anti-CD3 effector  
69 moiety was achieved through targeted mutations in the paratope. Thus, this is the first study where a  
70 comprehensive landscape of affinity for both target (in this case pHLA) and CD3 has been explored,  
71 with focused characterisation of *in vitro* activity.

72 We then used bespoke mathematical modelling, based on previously established models incorporating  
73 kinetic proofreading<sup>16</sup>, to better understand the mechanisms governing our observations and to  
74 provide insights into how bispecific T cell engagers can be further optimised. Together, these data  
75 demonstrate the importance of a CD3 ‘dark state’ formed by the prolonged activation of CD3, which  
76 has major implications for selecting affinity combinations that maximise both potency and specificity.  
77 Modelling the kinetic mechanisms contributing to T cell activation also highlights bispecific  
78 combinations that might improve the therapeutic window, allowing the use of higher drug dosages  
79 with less risk of mimetic-driven cross-reactivity.

80

## 81 Results

### 82 Generation of anti-CD3 affinity variants

83 An existing scFv antibody<sup>17</sup> that binds CD3 ( $E0 : K_D = 33.9 \text{ nM}$ ) was used as the basis for the  
84 generation of a panel of variants with a diverse range of binding affinities for CD3 (Table S1 and  
85 Figure S1 A). A site-directed alanine mutagenesis campaign guided by PDB 1XIW<sup>18</sup> was used to  
86 produce a range of mutants with weaker affinity, while affinity maturation via phage display was  
87 employed to produce variants with stronger affinities ( $K_D = 615 \text{ nM}$  (E8) to  $0.25 \text{ nM}$  (E42)).  
88 Additional site-directed mutagenesis combining both affinity enhancing and impairing mutations was  
89 used to further diversify the binding kinetics of the available anti-CD3 panel.

### 90 Intermediate CD3 binding generates optimal efficacy for on-target activation

91 We fused anti-CD3 scFv variants to an affinity-enhanced TCR specific for the NY-BR-1<sub>1106-1114</sub>  
92 peptide-HLA-A\*02:01 complex<sup>19</sup>. The affinity of this TCR-pHLA interaction was  $K_D = 370 \text{ pM}$  at  
93  $37^\circ\text{C}$  as measured by SPR (Table S2 and Figure S1 B).

94 The activity of this ImmTAC panel was assessed in T cell redirection assays using PBMC from HLA-  
95 A\*02:01 negative donors cultured with TAP-deficient T2 cells pulsed with target peptide, with IFN $\gamma$   
96 used as a readout of T cell activation. Very little cross-reactivity was observed when the ImmTAC  
97 molecules were titrated onto unpulsed T2 cells, even with the highest affinity anti-CD3 variants,  
98 demonstrating the absence of any relevant mimetic pHLA complexes in this system (Figure 1B and  
99 Figure S2).

100 The T cell redirection activity of bispecific molecules has two components; the potency, which  
101 represents the concentration of bispecific molecule required to observe activity, and the efficacy,  
102 which denotes the maximum level of activity observed. In the data presented here, potency and  
103 efficacy were not directly correlated: Variants with the weakest CD3 binding (E8 and E39) had low  
104 efficacy and potency, while the intermediate affinity variants, particularly E28, had the highest  
105 efficacy and good potency. The strong binding variants (E16, E17, E24, and E42), on the other hand,  
106 had the best potency but very poor efficacy.

107 Optimal efficacy can be seen with E2, E31, and E28 ImmTAC molecules, which have CD3 off-rates  
108 ranging from 1.2 – 4 mins and affinities of 144 –36 nM. E28 and E0 present a particularly interesting  
109 comparison as both had very similar affinities for CD3 (36 nM and 34 nM), but E28 had a faster on-  
110 rate and off-rate ( $t_{1/2}$  of 4.6 min *versus* 7.6 min for E0) and consistently gave a higher maximum  
111 response (Figure 1C-D). E8 and E39 were also similar in overall affinity (615 nM and 607 nM), but  
112 E8 had a slower off-rate ( $t_{1/2}$  of 0.6 min *versus* 0.2 min for E39) and outperformed E39, particularly in  
113 the more sensitive ELISpot assays (Figure S2). This suggests off-rate is a more useful predictor of  
114 activity than affinity alone.

115

### 116 Optimal anti-CD3 affinity is dependent on TCR-pHLA affinity

117 The observed kinetic optimum for CD3 engagement suggested an optimal duration for the  
118 pHLA:ImmTAC:CD3 bridging interaction, consistent with the optimal dwell time observed for  
119 conventional pHLA:TCR interactions<sup>15,20,21</sup>. Therefore, we hypothesised that T cell activation by an  
120 ImmTAC molecule with high affinity for both pHLA and CD3 might be increased by weakening the  
121 binding to pHLA. To test this, a range of peptide mimetics of NY-BR-1 were identified that, when  
122 presented in the context of HLA-A\*02:01, bound to the TCR with affinities ranging from  $K_D = 1.8$   
123 nM to 500  $\mu$ M (Table S2 and Figure S1 B). These mimetic peptides were assessed for stability using  
124 the NetMHC 4 server<sup>22</sup> and by confirming the presence of canonical anchor residues.

125 Four anti-CD3 variants with strong (E42), weak (E8), and intermediate (E0 and E28) binding to CD3  
126 were tested on T2 cells pulsed with the NY-BR1 peptide and the mimetic peptides. Consistent with  
127 our hypothesis, weakening the affinity of the TCR-pHLA interaction increased the efficacy of E42  
128 ImmTAC, while reducing both the efficacy and potency of E0, E28 and E8 ImmTAC molecules  
129 (Figure 2). When TCR affinity was weakened to  $K_D = 87$  nM (MimC peptide), E42 significantly  
130 outperformed the other variants. This remained true for all weaker TCR affinities up to 1-2  $\mu$ M  
131 (MimF and MimG), where activity was very low, even with E42. No activity was observed with the

132 MimH mimetic ( $K_D = 66 \mu\text{M}$ ) or MimI ( $K_D = 567 \mu\text{M}$ ; data not shown) with any anti-CD3 variant,  
133 suggesting an activity cut-off in the low micromolar range in this instance.

134 Given that an ImmTAC bridge can break by unbinding from either pMHC or CD3, we plotted the  
135 ImmTAC efficacy over the bridge lifetime ( $1 / (\text{pMHC koff} + \text{CD3 koff})$ ) (Figure 2C). While the data  
136 for E42 indicates an optimal duration for the pHLA:ImmTAC:CD3 bridging interaction, E8, E0 and  
137 E28 show a different optimum, indicating that a simple assessment of the duration of the bridging  
138 complex alone is not sufficient to fully explain the data.

139 Similar effects were also observed with a commercial CD4+ Jurkat NFAT luciferase assay when these  
140 cells were incubated with the same ImmTACs and peptide pulsed T2 cells (Figure S2 D), confirming  
141 the effect is not specific to IFN $\gamma$  release.

#### 142 Kinetic proofreading with limited signalling model fits observed T cell activation

143 To test whether a conventional model of T cell activation could help explain the experimental  
144 observations, a mathematical model was constructed based on previously published mechanisms.<sup>15,16</sup>  
145 Such a model can help simulate data out of reach of available experimental tools and further aid the  
146 design of highly optimised molecules depending on the targeted therapeutic niche.

147 Ten ordinary differential equations (ODEs) were defined based on an established ‘kinetic proof-  
148 reading with limited signalling’ model of T cell activation.<sup>15</sup> This model invokes a non-signalling  
149 ‘dark state’ for CD3 when the bridging interaction is sustained beyond a certain duration. The system  
150 of equations takes the kinetic binding rates as inputs along with starting concentrations based on cell  
151 density, predicted epitope number, and ImmTAC concentration. Changes in local concentration of  
152 free receptors and receptor-ImmTAC complexes on the surface of T cells and target cells are then  
153 modelled accordingly (Figure 3). Several variables were incorporated into the model to account for  
154 unknown parameters such as the rate of kinetic proofreading and rate of dark state formation. All  
155 constant and variable inputs are summarised in Table S3.

156 To fit the model to the observed data, Approximate Bayesian Computation coupled with Sequential  
157 Monte Carlo (ABC-SMC) analysis was carried out on individual data sets. The model gave a good fit  
158 to the dataset presented in Figure 1B (Figure 4A), where only CD3 affinity was varied. For the dataset  
159 presented in Figure 2A, where affinity for both CD3 and for pHLA was varied, the model captured the  
160 key features of the data, with some deviation (Figure 4B). Probability distributions and ‘best particle’  
161 parameters obtained for each experiment are shown in Figure S3 and Table S4. To test the robustness  
162 of these observations the output of the model was calculated after doubling individual constant or  
163 fitted parameters (Figure S4), demonstrating the pattern of behaviour was well conserved and would  
164 not be significantly altered by any errors in the measurement of binding kinetics.

165 Using this model, T cell activation was simulated with a wide range of pHLA and CD3 binding  
166 kinetics. The parameter values fitted in Figure 4B (Table S4) were used as this represented the  
167 broadest dataset in terms of both CD3 and pHLA binding. When TCR affinity was strong ( $K_D = 100$   
168 pM), a clear optimum off-rate was seen for anti-CD3 variants (~100s) past which strengthening CD3  
169 binding significantly reduced efficacy with minimal improvements to potency (Figure 5A, left panel).  
170 However, with weak TCR binding ( $K_D = 1 \mu\text{M}$ ), strengthening CD3 binding continuously improved  
171 potency without reducing efficacy (Figure 5A, right panel).

172 To better visualise the different effects of pHLA and CD3 off-rates on T cell responses, heat maps of  
173 predicted IFN $\gamma$  release were constructed by varying the off-rate combinations employed at three  
174 different ImmTAC concentrations (Figure 5B). At low ImmTAC concentrations of 10 pM, combining  
175 strong pHLA binding with intermediate CD3 binding gave more response than combining strong CD3  
176 binding with intermediate pHLA binding. This appears to be due to a better propensity for serial  
177 triggering with strong pHLA binding if, when dark state formation by both formats is equivalent, a  
178 bridging interaction is more likely to break to release ImmTAC bound to pHLA, which is then more  
179 primed to serially-trigger than an ImmTAC bound to a CD3 molecule still in the dark state. This  
180 benefit is lost if recovery from the dark state is made extremely fast (Figure S5), and above 1 nM  
181 ImmTAC strong pHLA binding had no clear advantage over strong CD3 binding. Combining both



182 strong pHLA and strong CD3 binding gave no advantage at any concentration due to dark-state  
183 formation.

## 184 Reducing CD3 affinity is predicted to widen the therapeutic window

185 As well as optimising potency, the different CD3 and pHLA binding optima demonstrated here  
186 provide an opportunity to select bispecifics with improved discrimination between high-affinity target  
187 and low-affinity mimetics. To model T cell responses when both on and off-target pHLA ligands are  
188 presented together, five ODEs were added to the mathematical model to describe local concentrations  
189 of free off-target pHLA, off-target ImmTAC complex, off-target-CD3 bridge, off-target active  
190 signalling, and off-target-dark-state bridge.

191 Simulations with this expanded model showed that when T cells were exposed to both a high affinity  
192 target peptide ( $K_D = 1$  nM) and an intermediate affinity ‘mimetic’ ( $K_D = 100$  nM), a hybrid response  
193 profile was obtained (Figure 6A). With strong CD3 binding ( $K_D = 0.1$  nM – 10 nM), dark state  
194 formation suppresses on-target activity, limiting potency (Figure 6A, left), while at the same time  
195 potency on cells presenting the mimetic alone is increased (Figure 6A, right). This means that with a  
196 strong affinity TCR, strengthening CD3 affinity will shrink the therapeutic window if relevant  
197 mimetics are present, whereas weakening CD3 binding up to a point can widen this window.

198 To confirm whether the therapeutic window could also be increased based on the finding from the  
199 model, we collected data using an alternate affinity-enhanced TCR (TCR-X) that binds its target  
200 pHLA complex with a  $K_D$  of 76 pM at 37 °C ( $t_{1/2} = 325$  min, Table S2). Unlike the NY-BR-1 specific  
201 TCR, TCR-X displays cross-reactivity towards unpulsed T2 cells and antigen-negative cells, allowing  
202 changes to the therapeutic window to be more readily examined.

203 ImmTAC molecules were made by fusing TCR-X with a select panel of anti-CD3 variants, then  
204 titrated onto TAP-deficient T2 cells that were either left unpulsed or pulsed with target peptide. T cell  
205 activation was assessed using an IFN $\gamma$  ELISpot assay to maximise sensitivity (Figure 6B) and the new  
206 15 ODE model was fitted to the experimental data (Figure S6 with fitted parameters in Table S5).

207 As predicted by the model, strengthening CD3 binding gave minimal improvement to on-target  
208 activity with this high affinity target, while cross-reactivity to unpulsed cells steadily increased (Fig  
209 6B and S6), thus shrinking the therapeutic window. The effect was so striking that barely any window  
210 remained between target-pulsed and unpulsed cells with the strong CD3 binding E24 variant. The  
211 weaker binding E2 variant on the other hand gave some improvement to the therapeutic window  
212 relative to E0.

213 The identity of the mimetic peptide (or peptides) bound by TCR-X on unpulsed T2 cells is unknown,  
214 but as part of model fitting, a single 'mimetic off-rate' and 'copies per cell' were fitted to the data  
215 alongside other parameters. Using the data from one representative effector PBMC donor, the fitted  
216 parameters produced a mimetic off-rate of  $0.015\text{ s}^{-1}$ , ( $K_D = 30\text{ nM}$ ), and 86 copies per cell (Table S5).  
217 However, it remains possible that cross-reactivity is due to a more complex mixture of mimetics, or  
218 very weak binding to empty HLA.

219 The importance of very high target affinity for this effect on therapeutic window was further  
220 supported by experiments with a TCR that binds its cognate MAGE-A3 pHLA with a weaker  $K_D$  of  
221 17 nM and a  $t_{1/2}$  of 3.6 mins at  $37^\circ\text{C}$  (Table S2). This TCR had previously been used in a T cell  
222 therapy clinical trial that was discontinued due to unpredicted cross-reactivity to a Titin-derived  
223 mimetic.<sup>23,24</sup> Our measurements show this Titin mimetic bound the TCR with an affinity of 183 nM  
224 and a  $t_{1/2}$  of 0.46 mins at  $37^\circ\text{C}$  (Table S2). The fast off-rate of this TCR when binding its target  
225 suggests that dark-state formation is not likely to be a significant factor; and indeed, in contrast to  
226 TCR-X, a gain of potency was seen with the high affinity E24 variant on both target and mimetic  
227 without a large drop in efficacy, while the weaker binding E2 variant reduced potency with both the  
228 target MAGE-A3 and mimetic Titin peptides. This demonstrates that weakening CD3 binding only  
229 improves the therapeutic window when target pHLA binding has a very high affinity.

### 230 [Optimum CD3 affinity reflected in T cell cytotoxicity as well as IFN \$\gamma\$ release](#)

231 The experiments in this manuscript have primarily focused on measuring IFN $\gamma$  through direct  
232 measurement by ELISpot and ELISA. However, cytokine release is only one aspect of the T cell

233 response and for CD8 T cells cytokine release has been shown to be much less sensitive to activation  
234 than cytotoxic responses such as microtubule reorganisation and release of perforin<sup>25</sup>. To investigate  
235 the effect of CD3 binding affinity on cytotoxicity, killing assays were carried out with both TCR-X  
236 and anti-NY-BR-1 ImmTAC molecules.

237 The due to the cross-reactivity profile of the TCR, experiments with TCR-X focused on testing  
238 intermediate and weak CD3 binding affinity variants in several different cytokine release assays  
239 (Figure S7 A and B) and an Incucyte killing assay (Figure S7 C). These results confirmed optimum  
240 activity was seen with the E28 variant, or kinetically similar E30 variant, with both cytokine release  
241 and killing.

242 A panel of anti-NY-BR-1 ImmTAC molecules with the full range of CD3 affinities was assayed  
243 against CAMA-1 A2B2M antigen-positive and SKMEL28 A2B2M antigen-negative cell lines in an  
244 Incucyte killing assay (Figure 7 A and S6 A). Again, E28 performed best, supporting a similar kinetic  
245 optimum for both killing and IFN $\gamma$  release. In these assays though the high-affinity anti-CD3 variants  
246 E42, E24 and E17 all reached comparatively higher Emax levels, as measured by area under the curve  
247 analysis of killing up to 48 hrs. Killing assay protocols use significantly more effector cells than IFN $\gamma$   
248 ELISA and ELISpot assays to get a clear readout (10:1 instead of 1:1), but an ELISA carried out on  
249 media samples saved at the end of the killing experiment confirmed the discrepancy between killing  
250 and cytokine release with high affinity CD3 binding (Figure 7 B). Similar results were seen with a  
251 different batch of effector PBMC using an alternative Phenix killing assay that could monitor both  
252 living and dead cells (Figure 7C and S6 C).

253 While interesting these observations do not undermine the earlier conclusions that a receptor dark  
254 state supports an optimum dwell time for T cell triggering. If cytotoxicity is more sensitive to early  
255 triggering, and responds more rapidly to T cell stimulation, it might be less sensitive to dark-state  
256 formation than cytokine release. It should also be considered that the output of a cytotoxicity assay  
257 may be more limited in its dynamic range as there are only a certain number of target cells available  
258 to kill in each assay and they provide a more binary readout of T cell activity. Similarly the kinetics of  
259 the killing process is more limited by rate of T cell movement, as well as other factors, whereas

260 cytokine release is ultimately limited by the translational output of the T cells, creating many potential  
261 discrepancies in the dynamic range of the response. Accurately modelling changes in pHLA  
262 presentation and other effects of cell killing would demand a significantly more complex model that  
263 fell outside the scope of this project. However, future studies might be designed to investigate these  
264 subtle distinctions between cytokine release and cytotoxicity, as well as conducting carefully designed  
265 *in vivo* studies to assess what combinations of these effects are most beneficial for reducing tumour  
266 burden.

## 267 Discussion

268 To design an effective T cell engaging bispecific molecule, it must be made sufficiently potent to  
269 redirect patient T cells towards target cells at the chosen dose, while not triggering activation towards  
270 normal cells. A potentially dose-limiting toxicity observed with many T cell redirecting therapies is  
271 cytokine release syndrome.<sup>26</sup> Stronger CD3 binding has previously been associated with increased  
272 incidence of systemic cytokine release and a CD38xCD3 bispecific antibody with unacceptable  
273 toxicity in non-human primates became better tolerated and more efficacious when the CD3 binding  
274 portion was engineered to weaken binding.<sup>27</sup> Similarly, a CLL-1xCD3 bispecific with weak CD3  
275 binding gave reduced systemic cytokine response compared to a strong CD3 binder,<sup>28</sup> and both *in*  
276 *vitro* and in CD3-humanized mice, a HER2-targeted CD3 bispecific with strong CD3 binding induced  
277 greater cytokine production than one with weaker CD3 binding, despite comparable *in vivo* antitumor  
278 activity.<sup>29</sup> One possible contributor to this effect could be the relationship we have demonstrated here  
279 between strong CD3 binding and increased responsiveness to weak off-target interactions.

280 Naturally occurring TCRs typically bind cognate HLA molecules with weak affinities, (micromolar  
281 range). However, the ImmTAC platform uses TCRs engineered for strong binding, (typically with  
282 picomolar affinities), while maximising the affinity window between target and mimetic pHLAs. The  
283 use of highly specific, picomolar-affinity TCRs here has enabled exploration of a range of binding  
284 strengths and specificities out of reach to previous studies. Molecules that target pHLA with  
285 intermediate affinity require stronger affinity CD3 binding to increase potency, which risks boosting

286 cross-reactivity to weakly binding mimetic pHLAs that are often difficult to detect and characterise.  
287 The use of very strong affinity TCRs, on the other hand, allows tuning of anti-CD3 kinetics and opens  
288 up a valuable therapeutic niche; one where on-target potency and efficacy can be maximised, while  
289 minimising off-target activation by mimetic pHLAs. ImmTAC molecules already go through a  
290 rigorous preclinical safety package during their development, establishing the highly specific potential  
291 of this technology,<sup>30</sup> and tuning anti-CD3 kinetics on a case by case basis makes it likely more  
292 therapeutic molecules will be able to meet these stringent criteria.

293 In this study, we have exclusively used bispecifics of the ImmTAC format, maintaining the same  
294 spatial relationship between the target-engaging and CD3-engaging moieties. Activity of CD3  
295 bispecifics can be affected by factors such as distance of target epitope from the cell membrane,<sup>12,31</sup>  
296 CD3 epitope,<sup>32</sup> and target distribution/mobility.<sup>33</sup> As such, while the model is anticipated to be  
297 broadly applicable, the parameters identified by the model are likely to be specific to the conditions  
298 tested. For the vast array of other bispecific formats, with differing spatial arrangements of target and  
299 CD3 binding,<sup>34,35</sup> the optima for target and CD3 affinity may vary. Additionally many antibody based  
300 bispecific therapies bind to cancer surface antigens on target cells rather than pHLA which will alter  
301 their mode of action, as, unlike pHLA, these antigens are unable to recruit CD4 and CD8 co-  
302 receptors, and so may display significantly different optima.

303 We have shown that for both target engagement and CD3 engagement strong binding does not always  
304 improve potency and can be detrimental to T cell activity when the other arm of the bispecific also  
305 binds strongly. This is inconsistent with previous models of activity of CD3 bispecifics based on their  
306 binding kinetics,<sup>36-39</sup> which have assumed a direct relationship between T cell activation and the  
307 concentration of the trimeric complex formed between CD3, bispecific, and target. In such a model,  
308 there is no optimal CD3 affinity for on-target activity, as stronger binding will always result in a  
309 higher concentration of trimer and greater T cell activation. This contrasts with conventional models  
310 of T cell activation where it is clear that the number of CD3 bridging interactions is not the sole  
311 determinant of activity,<sup>15</sup> and the duration of bridging interactions plays a key role. The concept of  
312 HLA:TCR bridging interactions having an optimal dwell-time is well-established,<sup>40</sup> with the upper

313 limit variously explained by sustained signalling or limited signalling. Various mathematical models  
314 of T cell activation have been developed to explore the nature of this relationship.<sup>14,20,41-43</sup> This  
315 concept has been invoked in the context of bispecific T cell engagers,<sup>44</sup> but no corresponding  
316 mathematical model has previously been published.

317 The observation reported here that the optimum CD3 affinity for maximum response depends on  
318 target affinity, indicates a mechanism for improving specificity that is also incompatible with models  
319 driven purely by the concentration of target, biologic and effector. These experiments demonstrate  
320 that the affinity of CD3 engagement can be selected to maximally differentiate between high-affinity  
321 on-target interactions and low-affinity off-target interactions, to improve therapeutic window.

322 Our studies have focused on IFN $\gamma$  release and cytotoxicity as the main outputs of T cell activation. It  
323 is possible that other cytokines could be affected differently. However, a recent study suggests that  
324 TNF- $\alpha$  and IL-2 release both share a similar activation threshold to IFN $\gamma$  and respond similarly to co-  
325 stimulation.<sup>45</sup> The differing sensitivity of T cell killing and cytokine release is well documented,<sup>46</sup> and  
326 a number of studies have recently suggested the possibility of uncoupling cytotoxicity and cytokine  
327 release.<sup>32,37</sup> It could be hypothesised that if cytotoxicity is more sensitive to early triggering, and  
328 responds more rapidly to T cell stimulation, it might be less sensitive to dark-state formation than  
329 cytokine release. However, as the optimum anti-CD3 kinetics were the same for both cytokine release  
330 and cytotoxicity with two different TCRs, this suggests effective uncoupling cannot be achieved by  
331 altering affinity alone.

332 The affinity of a bispecific for CD3 has additional effects beyond those assessed here, including  
333 effects on the biodistribution and clearance of the bispecific molecule.<sup>28,47</sup> This manuscript focuses  
334 solely on the effects of affinity on T cell activation *in vitro* and when seeking to maximise potency  
335 and efficacy *in vivo* the role of biodistribution may well out-weigh concerns over optimising for T cell  
336 activation. Meaningful *in vivo* studies can be challenging to design for Immunotherapies, owing to the  
337 many sequence differences between human patients and model organisms. However, at this time only  
338 *in vivo* studies have the potential to comprehensively model clinical outcomes, and factor in the many  
339 different processes that may help and hinder ImmTAC activity in the body.

340 Understanding the trade-offs between the different effects of CD3 affinity through all means available  
341 should allow future development of safer, more effective therapeutics. With promising results with T  
342 cell redirecting molecules in clinical trials,<sup>5,48-51</sup> and many more in the pipeline, the age of bispecific  
343 therapies appears to be dawning. This study provides valuable information for developing the next  
344 generation of bispecific molecules, helping these game-changing drugs realise their maximum clinical  
345 potential.

346

## 347 **Materials and methods**

### 348 **Proteins and affinities**

349 ImmTAC fusion proteins were expressed in the BL21 (DE3) Rosetta pLysS strain, and refolded from  
350 inclusion bodies and purified as previously described.<sup>52</sup> Purity was checked by reducing and non-  
351 reducing SDS-PAGE and concentrations assessed by A280 measurement and extinction coefficients  
352 derived from sequence by the inbuilt DNAdynamo algorithm. Peptide HLA molecules were also  
353 produced as previously described.<sup>53</sup>

354 Binding kinetics and affinities were measured by surface plasmon resonance by amine coupling  
355 CD3 $\epsilon\delta$  expressed by HEK293 cells using a knob-in-holes Fc format (ACRO biosystems CDD-  
356 H52W0) to the CM5 sensor chip. Experiments were carried out using the single cycle protocol of the  
357 Biacore T200 system at 37 °C in PBS with 0.005% surfactant P20 with 5mM HCl used for chip  
358 regeneration between each experiment.

### 359 **Cell lines and cell culture**

360 Cell lines used in this study were grown according to the manufacturers' instructions. CAMA-1 cells  
361 (ATCC<sup>®</sup> HTB-21<sup>™</sup>) express a low level of HLA-A2 that result in very low surface levels, thus this  
362 cell line was transduced in-house with a lentivirus containing HLA-A2 and beta 2-microglobulin  
363 (CAMA-1 A2b2m) for assays with ImmTAC-NY-BR-1. SKMEL28 A2B2M cell line was produced  
364 in the same way. Cell line authentication and mycoplasma testing were routinely carried out by the  
365 LGC Standards Cell line Authentication Service ([www.lgcstandards.com](http://www.lgcstandards.com)) and Mycoplasma  
366 Experience Ltd ([www.mycoplasma-exp.com](http://www.mycoplasma-exp.com)), respectively. Peripheral blood mononuclear cells  
367 (PBMCs) were obtained from StemCell (lot SC003 1807130132, HLA-A0101,A0301) and Discovery  
368 Life Sciences (lot CB004Z1110036544120518A, HLA-A0301,A1101).

### 369 **IFN $\gamma$ ELISPOT and ELISA**

370 IFN $\gamma$  ELISpot and ELISA assays were carried out according to the manufacturer's instructions (BD  
371 BioSciences,Cat #552138; R&D, cat # DY285B; and Glo reagent,cat # DY993. Either in 384 well  
372 (12500 T2 and 12500 PBMC), or 96 well format (50,000 T2 and 50,000 PBMC). T2 cells were pulsed



373 with peptides, either by adding NY-BR-1 specific peptide or irrelevant TAX peptide directly into the  
374 microplate wells at final concentrations ranging from 2.5  $\mu$ M to 5 nM. For ELISpot plates were  
375 incubated overnight at 37 °C/5 % CO<sub>2</sub> and quantified using an automated ELISpot reader  
376 (Immunospot Series 5 Analyzer, Cellular Technology Ltd.) or for ELISA plates were incubated for 48  
377 hrs before developing using the R&D, cat # DY285B protocol and reading with an Enspire plate  
378 reader.

#### 379 **Jurkat Luciferase assay**

380 The same 96 well setup was used as for the PBMC assay with 50000 T2 and 50000 Jurkat NFAT-  
381 Luciferase cells per well (Promega) in 100ul R10 medium. Plates were incubated for 22 hours at 37  
382 °C/5 % CO<sub>2</sub> prior to addition of 33ul Bio-Glo reagent (Promega G7940), then luminescence was read  
383 on a Clariostar plate reader.

#### 384 **Incucyte S3 killing assay**

385 NY-BR-1 antigen positive cell line CAMA-1 A2B2M and antigen negative SKMEL28 A2B2M were  
386 stained with CellTracker™ Deep Red Dye (Invitrogen, C34565) and seeded at 15000 and 10000  
387 cells/well, respectively, in a 96 well cell culture plate and left to rest for 24 hours. NY-BR-1 anti-CD3  
388 variant ImmTAC molecules were titrated and added together with HLA-A\*02:01-negative PBMC  
389 donor (CB004) at a 10:1 E:T ratio. Target cells and effectors were stained with a green Caspase 3/7  
390 dye for tracking cell apoptosis (Incucyte Caspase-3/7 Green Apoptosis Assay Reagent, Essen  
391 Bioscience, 4440). Cells were incubated for 96 hours in the Incucyte S3 Live-Cell Analysis System  
392 (Essen Bioscience, 4647), which uses real-time quantitative live cell imaging, based on fluorescent  
393 nuclear staining of the Caspase-3/7 activated dye, to track the numbers of apoptotic cells at regular  
394 time points. Plates were removed from the incubator after 96 hours and supernatant was collected for  
395 IFN $\gamma$  ELISA. The results of the killing assay were analysed with the Incucyte software and Graph Pad  
396 Prism used to plot 48 hour Area Under the Curve of killing over different ImmTAC concentrations.

#### 397 **Phenix Killing assay**

398 The Opera Phenix system (Perkin Elmer) was also used to follow both target cell growth and killing  
399 simultaneously. In this assay an effector : target ratio of 4:1 was used. Target cells were counted and  
400 plated at 15,000 cells/well in 100 uL/well (CAMA1-A2B2M) on the day prior to setting up the assay  
401 PBMCs were thawed from liquid nitrogen on day 2 counted, stained with 2 uM CellTracker DeepRed  
402 and plated in 50uL/well. NucView488 reagent was added to effectors to give a 0.8 uM final  
403 concentration on the well. Hoechst was added to effectors to give a final concentration of 150 nM n  
404 the well. Plates were imaged with the 5X objective every 6h over 96h.

405

#### 406 **Mathematical modelling**

407 The mathematical model was built using Matlab and parameter inputs described in Table S3. Cell  
408 numbers, well area and values for CD3 and HLA copy numbers per cell were used to calculate  
409 effective local concentrations at the bottom of the experiment well for a section with a width of 1  
410 micron and establish initial conditions for a system of 10 ordinary differential equations (ODEs), or  
411 15 ODEs in the case of the cross-reactivity model (complete sets of ODE equations are included in  
412 supplementary material). The local concentration of ImmTAC was included in the differential  
413 equation system and was replaced from the bulk solution at a rapid rate which did not lead to any  
414 significant depletion of available ImmTAC in these models. For most fitting and modelling the  
415 ODE23s solver was used over a time course of 48 hrs for ELISA experiments and 24 hrs for ELISpot,  
416 except with the cross-reactive model where ODE15s was used.

417 To convert the ODE solutions into the quantity of IFN $\gamma$  expected at the end of the experiment, the  
418 local concentration of signalling complexes was converted to a rate of IFN $\gamma$  production expected at  
419 that moment by applying a hill function with a hill slope of 1 and fitting a maximum level of  
420 production (IFNmax) and a sensitivity level (IFNC50).

$$IFN\gamma_{prod} = \frac{IFNmax}{1 + \left(\frac{[G]}{IFNC50}\right)^{-1}}$$

421

422 This equation was applied for the entire output vector and the area under the curve for the relevant  
423 time period was then calculated using the ‘trapz’ matlab function to obtain a total amount of IFN $\gamma$   
424 produced in that time. This method does not explicitly account for degradation or reuptake of IFN $\gamma$ ,  
425 and so any effects of these processes will be incorporated into the fitted IFNC50 and IFNmax  
426 parameters.

427 Fitting the model to the data was performed using the ABC SMC method previously described.<sup>54,55</sup>  
428 1800 particles were generated at each iteration. Upper bounds and lower bounds were set depending  
429 on best guesses and are listed next to the fitted values in Supplementary Tables S4 and S5. Fit was  
430 assessed by combining the squared difference of simulated values from the mean of measured data  
431 plus standard deviation, meaning that any simulated values falling within the standard deviation of the  
432 data were considered to give a fit with no penalty. A minimum standard deviation of 10 pg/ml was  
433 applied to ELISA data and 5 spots to ELISpot data to account for any potential error not appropriately  
434 measured by the experiment.

### 435 [Acknowledgments](#)

436 All work was funded by Immunocore LTD. The Authors would like to thank Robert Pengally for his  
437 assistance refolding pHLA material, Laure Humbert for her assistance with preliminary cell assays  
438 relating to this project, and Michelle McCully for their helpful comments and edits to this manuscript.

### 439 [Declaration of interests](#)

440 I. B. R., R. O., S. H and P.B.K are current employees of Immunocore and hold Immunocore stock  
441 and/or options.

### 442 [Author Contributions](#)

443 Conceptualization: I. B. R., R.M., N.D., A.V., R. O., S. H. and P.B.K.; Formal analysis: O.D. and  
444 I.B.R. Investigation: I.B.R., R.M., N.D., A.V., M.C., R.O. and F.A.; Writing – Original Draft: I.B.R  
445 and P.B.K.; Writing – Review & Editing: I.B.R, P.B.K., O.D., and D.C.; Supervision: R. O., S. H. and  
446 P.B.K.

447 **Keywords**

448 Tcell activation, bispecific, affinity, kinetics, CD3, mathematical modelling, cytokine release,  
449 cytotoxicity, optimisation

450 **References**

451

- 452 1. Nathan, P., Hassel, J.C., Rutkowski, P., Baurain, J.F., Butler, M.O., Schlaak, M., Sullivan, R.J.,  
453 Ochsenreither, S., Dummer, R., Kirkwood, J.M., Joshua, A.M., et al. (2021). Overall Survival  
454 Benefit with Tebentafusp in Metastatic Uveal Melanoma. *The New England journal of*  
455 *medicine* *385*, 1196-1206. [10.1056/NEJMoa2103485](https://doi.org/10.1056/NEJMoa2103485).
- 456 2. de la Roche, M., Asano, Y., and Griffiths, G.M. (2016). Origins of the cytolytic synapse. *Nature*  
457 *reviews. Immunology* *16*, 421-432. [10.1038/nri.2016.54](https://doi.org/10.1038/nri.2016.54).
- 458 3. Richard, A.C., Frazer, G.L., Ma, C.Y., and Griffiths, G.M. (2021). Staggered starts in the race to  
459 T cell activation. *Trends in immunology* *42*, 994-1008. [10.1016/j.it.2021.09.004](https://doi.org/10.1016/j.it.2021.09.004).
- 460 4. Brameshuber, M., Kellner, F., Rosboth, B.K., Ta, H., Alge, K., Sevcsik, E., Gohring, J., Axmann,  
461 M., Baumgart, F., Gascoigne, N.R.J., Davis, S.J., et al. (2018). Monomeric TCRs drive T cell  
462 antigen recognition. *Nature immunology* *19*, 487-496. [10.1038/s41590-018-0092-4](https://doi.org/10.1038/s41590-018-0092-4).
- 463 5. Cantrell, D. (2015). Signaling in lymphocyte activation. *Cold Spring Harbor perspectives in*  
464 *biology* *7*. [10.1101/cshperspect.a018788](https://doi.org/10.1101/cshperspect.a018788).
- 465 6. Irvine, D.J., Purbhoo, M.A., Krogsgaard, M., and Davis, M.M. (2002). Direct observation of  
466 ligand recognition by T cells. *Nature* *419*, 845-849. [10.1038/nature01076](https://doi.org/10.1038/nature01076).
- 467 7. Purbhoo, M.A., Irvine, D.J., Huppa, J.B., and Davis, M.M. (2004). T cell killing does not require  
468 the formation of a stable mature immunological synapse. *Nature immunology* *5*, 524-530.  
469 [10.1038/ni1058](https://doi.org/10.1038/ni1058).
- 470 8. Bridgeman, J.S., Sewell, A.K., Miles, J.J., Price, D.A., and Cole, D.K. (2012). Structural and  
471 biophysical determinants of alphabeta T-cell antigen recognition. *Immunology* *135*, 9-18.  
472 [10.1111/j.1365-2567.2011.03515.x](https://doi.org/10.1111/j.1365-2567.2011.03515.x).
- 473 9. Kersh, G.J., Kersh, E.N., Fremont, D.H., and Allen, P.M. (1998). High- and low-potency ligands  
474 with similar affinities for the TCR: the importance of kinetics in TCR signaling. *Immunity* *9*,  
475 817-826. [10.1016/s1074-7613\(00\)80647-0](https://doi.org/10.1016/s1074-7613(00)80647-0).
- 476 10. McKeithan, T.W. (1995). Kinetic proofreading in T-cell receptor signal transduction.  
477 *Proceedings of the National Academy of Sciences of the United States of America* *92*, 5042-  
478 5046. [10.1073/pnas.92.11.5042](https://doi.org/10.1073/pnas.92.11.5042).
- 479 11. Offner, S., Hofmeister, R., Romaniuk, A., Kufer, P., and Baeuerle, P.A. (2006). Induction of  
480 regular cytolytic T cell synapses by bispecific single-chain antibody constructs on MHC class I-  
481 negative tumor cells. *Molecular immunology* *43*, 763-771. [10.1016/j.molimm.2005.03.007](https://doi.org/10.1016/j.molimm.2005.03.007).
- 482 12. Li, J., Stagg, N.J., Johnston, J., Harris, M.J., Menzies, S.A., DiCara, D., Clark, V., Hristopoulos,  
483 M., Cook, R., Slaga, D., Nakamura, R., et al. (2017). Membrane-Proximal Epitope Facilitates  
484 Efficient T Cell Synapse Formation by Anti-FcRH5/CD3 and Is a Requirement for Myeloma  
485 Cell Killing. *Cancer cell* *31*, 383-395. [10.1016/j.ccell.2017.02.001](https://doi.org/10.1016/j.ccell.2017.02.001).
- 486 13. Liddy, N., Bossi, G., Adams, K.J., Lissina, A., Mahon, T.M., Hassan, N.J., Gavarret, J., Bianchi,  
487 F.C., Pumphrey, N.J., Ladell, K., Gostick, E., et al. (2012). Monoclonal TCR-redirected tumor  
488 cell killing. *Nature medicine* *18*, 980-987. [10.1038/nm.2764](https://doi.org/10.1038/nm.2764).
- 489 14. Dushek, O., Aleksic, M., Wheeler, R.J., Zhang, H., Cordoba, S.P., Peng, Y.C., Chen, J.L.,  
490 Cerundolo, V., Dong, T., Coombs, D., and van der Merwe, P.A. (2011). Antigen potency and  
491 maximal efficacy reveal a mechanism of efficient T cell activation. *Science signaling* *4*, ra39.  
492 [10.1126/scisignal.2001430](https://doi.org/10.1126/scisignal.2001430).
- 493 15. Lever, M., Lim, H.S., Kruger, P., Nguyen, J., Trendel, N., Abu-Shah, E., Maini, P.K., van der  
494 Merwe, P.A., and Dushek, O. (2016). Architecture of a minimal signaling pathway explains

- 495 the T-cell response to a 1 million-fold variation in antigen affinity and dose. Proceedings of  
496 the National Academy of Sciences of the United States of America *113*, E6630-E6638.  
497 10.1073/pnas.1608820113.
- 498 16. Lever, M., Maini, P.K., van der Merwe, P.A., and Dushek, O. (2014). Phenotypic models of T  
499 cell activation. *Nature reviews. Immunology* *14*, 619-629. 10.1038/nri3728.
- 500 17. Zhu, Z., Lewis, G.D., and Carter, P. (1995). Engineering high affinity humanized anti-  
501 p185HER2/anti-CD3 bispecific F(ab')<sub>2</sub> for efficient lysis of p185HER2 overexpressing tumor  
502 cells. *International journal of cancer* *62*, 319-324. 10.1002/ijc.2910620315.
- 503 18. Arnett, K.L., Harrison, S.C., and Wiley, D.C. (2004). Crystal structure of a human CD3-  
504 epsilon/delta dimer in complex with a UCHT1 single-chain antibody fragment. Proceedings  
505 of the National Academy of Sciences of the United States of America *101*, 16268-16273.  
506 10.1073/pnas.0407359101.
- 507 19. Holland, C.J., Crean, R.M., Pentier, J.M., de Wet, B., Lloyd, A., Srikanthasan, V., Lissin, N.,  
508 Lloyd, K.A., Blicher, T.H., Conroy, P.J., Hock, M., et al. (2020). Specificity of bispecific T cell  
509 receptors and antibodies targeting peptide-HLA. *The Journal of clinical investigation* *130*,  
510 2673-2688. 10.1172/JCI130562.
- 511 20. Coombs, D., Kalergis, A.M., Nathenson, S.G., Wofsy, C., and Goldstein, B. (2002). Activated  
512 TCRs remain marked for internalization after dissociation from pMHC. *Nature immunology* *3*,  
513 926-931. 10.1038/ni838.
- 514 21. Gonzalez, P.A., Carreno, L.J., Coombs, D., Mora, J.E., Palmieri, E., Goldstein, B., Nathenson,  
515 S.G., and Kalergis, A.M. (2005). T cell receptor binding kinetics required for T cell activation  
516 depend on the density of cognate ligand on the antigen-presenting cell. Proceedings of the  
517 National Academy of Sciences of the United States of America *102*, 4824-4829.  
518 10.1073/pnas.0500922102.
- 519 22. Jurtz, V., Paul, S., Andreatta, M., Marcatili, P., Peters, B., and Nielsen, M. (2017).  
520 NetMHCpan-4.0: Improved Peptide-MHC Class I Interaction Predictions Integrating Eluted  
521 Ligand and Peptide Binding Affinity Data. *Journal of immunology* *199*, 3360-3368.  
522 10.4049/jimmunol.1700893.
- 523 23. Raman, M.C., Rizkallah, P.J., Simmons, R., Donnellan, Z., Dukes, J., Bossi, G., Le Provost, G.S.,  
524 Todorov, P., Baston, E., Hickman, E., Mahon, T., et al. (2016). Direct molecular mimicry  
525 enables off-target cardiovascular toxicity by an enhanced affinity TCR designed for cancer  
526 immunotherapy. *Scientific reports* *6*, 18851. 10.1038/srep18851.
- 527 24. Linné, G.P., Stadtmauer, E.A., Maus, M.V., Rapoport, A.P., Levine, B.L., Emery, L., Litzky, L.,  
528 Bagg, A., Carreno, B.M., Cimino, P.J., Binder-Scholl, G.K., et al. (2013). Cardiovascular toxicity  
529 and titin cross-reactivity of affinity-enhanced T cells in myeloma and melanoma. *Blood* *122*,  
530 863-871. 10.1182/blood-2013-03-490565.
- 531 25. Vafa, O., and Trinklein, N.D. (2020). Perspective: Designing T-Cell Engagers With Better  
532 Therapeutic Windows. *Frontiers in oncology* *10*, 446. 10.3389/fonc.2020.00446.
- 533 26. Teachey, D.T., Rheingold, S.R., Maude, S.L., Zugmaier, G., Barrett, D.M., Seif, A.E., Nichols,  
534 K.E., Suppa, E.K., Kalos, M., Berg, R.A., Fitzgerald, J.C., et al. (2013). Cytokine release  
535 syndrome after blinatumomab treatment related to abnormal macrophage activation and  
536 ameliorated with cytokine-directed therapy. *Blood* *121*, 5154-5157. 10.1182/blood-2013-02-  
537 485623.
- 538 27. Moore, G.L., Lee, S.-H., Schubbert, S., Miranda, Y., Rashid, R., Pong, E., Phung, S., Chan, E.W.,  
539 Chen, H., Endo, N., Ardila, M.C., et al. (2015). Tuning T Cell Affinity Improves Efficacy and  
540 Safety of Anti-CD38 × Anti-CD3 Bispecific Antibodies in Monkeys - a Potential Therapy for  
541 Multiple Myeloma. *Blood* *126*, 1798-1798. 10.1182/blood.V126.23.1798.1798.
- 542 28. Leong, S.R., Sukumaran, S., Hristopoulos, M., Totpal, K., Stainton, S., Lu, E., Wong, A., Tam,  
543 L., Newman, R., Vuilleminot, B.R., Ellerman, D., et al. (2017). An anti-CD3/anti-CLL-1  
544 bispecific antibody for the treatment of acute myeloid leukemia. *Blood* *129*, 609-618.  
545 10.1182/blood-2016-08-735365.

- 546 29. Stafflin, K., Zuch de Zafra, C.L., Schutt, L.K., Clark, V., Zhong, F., Hristopoulos, M., Clark, R., Li,  
547 J., Mathieu, M., Chen, X., Johnston, J., et al. (2020). Target arm affinities determine  
548 preclinical efficacy and safety of anti-HER2/CD3 bispecific antibody. *JCI insight* 5.  
549 10.1172/jci.insight.133757.
- 550 30. Harper, J., Adams, K.J., Bossi, G., Wright, D.E., Stacey, A.R., Bedke, N., Martinez-Hague, R.,  
551 Blat, D., Humbert, L., Buchanan, H., Le Provost, G.S., et al. (2018). An approved in vitro  
552 approach to preclinical safety and efficacy evaluation of engineered T cell receptor anti-CD3  
553 bispecific (ImTAC) molecules. *PloS one* 13, e0205491. 10.1371/journal.pone.0205491.
- 554 31. Bluemel, C., Hausmann, S., Fluhr, P., Sriskandarajah, M., Stallcup, W.B., Baeuerle, P.A., and  
555 Kufer, P. (2010). Epitope distance to the target cell membrane and antigen size determine  
556 the potency of T cell-mediated lysis by BiTE antibodies specific for a large melanoma surface  
557 antigen. *Cancer immunology, immunotherapy : CII* 59, 1197-1209. 10.1007/s00262-010-  
558 0844-y.
- 559 32. Trinklein, N.D., Pham, D., Schellenberger, U., Buelow, B., Boudreau, A., Choudhry, P., Clarke,  
560 S.C., Dang, K., Harris, K.E., Iyer, S., Jorgensen, B., et al. (2019). Efficient tumor killing and  
561 minimal cytokine release with novel T-cell agonist bispecific antibodies. *mAbs* 11, 639-652.  
562 10.1080/19420862.2019.1574521.
- 563 33. Pfosser, A., Brandl, M., Salih, H., Grosse-Hovest, L., and Jung, G. (1999). Role of target  
564 antigen in bispecific-antibody-mediated killing of human glioblastoma cells: a pre-clinical  
565 study. *International journal of cancer* 80, 612-616. 10.1002/(sici)1097-  
566 0215(19990209)80:4<612::aid-ijc21>3.0.co;2-k.
- 567 34. Kontermann, R.E., and Brinkmann, U. (2015). Bispecific antibodies. *Drug discovery today* 20,  
568 838-847. 10.1016/j.drudis.2015.02.008.
- 569 35. Spiess, C., Zhai, Q., and Carter, P.J. (2015). Alternative molecular formats and therapeutic  
570 applications for bispecific antibodies. *Molecular immunology* 67, 95-106.  
571 10.1016/j.molimm.2015.01.003.
- 572 36. Betts, A., Haddish-Berhane, N., Shah, D.K., van der Graaf, P.H., Barletta, F., King, L., Clark, T.,  
573 Kamperschroer, C., Root, A., Hooper, A., and Chen, X. (2019). A Translational Quantitative  
574 Systems Pharmacology Model for CD3 Bispecific Molecules: Application to Quantify T Cell-  
575 Mediated Tumor Cell Killing by P-Cadherin LP DART((R)). *The AAPS journal* 21, 66.  
576 10.1208/s12248-019-0332-z.
- 577 37. Chen, W., Yang, F., Wang, C., Narula, J., Pascua, E., Ni, I., Ding, S., Deng, X., Chu, M.L., Pham,  
578 A., Jiang, X., et al. (2021). One size does not fit all: navigating the multi-dimensional space to  
579 optimize T-cell engaging protein therapeutics. *mAbs* 13, 1871171.  
580 10.1080/19420862.2020.1871171.
- 581 38. Chen, X., Kamperschroer, C., Wong, G., and Xuan, D. (2019). A Modeling Framework to  
582 Characterize Cytokine Release upon T-Cell-Engaging Bispecific Antibody Treatment:  
583 Methodology and Opportunities. *Clinical and translational science* 12, 600-608.  
584 10.1111/cts.12662.
- 585 39. Jiang, X., Chen, X., Carpenter, T.J., Wang, J., Zhou, R., Davis, H.M., Heald, D.L., and Wang, W.  
586 (2018). Development of a Target cell-Biologics-Effector cell (TBE) complex-based cell killing  
587 model to characterize target cell depletion by T cell redirecting bispecific agents. *mAbs* 10,  
588 876-889. 10.1080/19420862.2018.1480299.
- 589 40. Kalergis, A.M., Boucheron, N., Doucey, M.A., Palmieri, E., Goyarts, E.C., Vegh, Z., Luescher,  
590 I.F., and Nathenson, S.G. (2001). Efficient T cell activation requires an optimal dwell-time of  
591 interaction between the TCR and the pMHC complex. *Nature immunology* 2, 229-234.  
592 10.1038/85286.
- 593 41. Chan, C., George, A.J., and Stark, J. (2001). Cooperative enhancement of specificity in a  
594 lattice of T cell receptors. *Proceedings of the National Academy of Sciences of the United*  
595 *States of America* 98, 5758-5763. 10.1073/pnas.101113698.

- 596 42. Dushek, O., and Coombs, D. (2008). Analysis of serial engagement and peptide-MHC  
597 transport in T cell receptor microclusters. *Biophysical journal* *94*, 3447-3460.  
598 [10.1529/biophysj.107.116897](https://doi.org/10.1529/biophysj.107.116897).
- 599 43. Valitutti, S., and Lanzavecchia, A. (1997). Serial triggering of TCRs: a basis for the sensitivity  
600 and specificity of antigen recognition. *Immunology today* *18*, 299-304.
- 601 44. Bortoletto, N., Scotet, E., Myamoto, Y., D'Oro, U., and Lanzavecchia, A. (2002). Optimizing  
602 anti-CD3 affinity for effective T cell targeting against tumor cells. *European journal of*  
603 *immunology* *32*, 3102-3107. [10.1002/1521-4141\(200211\)32:11<3102::AID-  
604 IMMU3102>3.0.CO;2-C](https://doi.org/10.1002/1521-4141(200211)32:11<3102::AID-IMMU3102>3.0.CO;2-C).
- 605 45. Abu-Shah, E., Trendel, N., Kruger, P., Nguyen, J., Pettmann, J., Kutuzov, M., and Dushek, O.  
606 (2020). Human CD8(+) T Cells Exhibit a Shared Antigen Threshold for Different Effector  
607 Responses. *Journal of immunology* *205*, 1503-1512. [10.4049/jimmunol.2000525](https://doi.org/10.4049/jimmunol.2000525).
- 608 46. Faroudi, M., Utzny, C., Salio, M., Cerundolo, V., Guiraud, M., Muller, S., and Valitutti, S.  
609 (2003). Lytic versus stimulatory synapse in cytotoxic T lymphocyte/target cell interaction:  
610 manifestation of a dual activation threshold. *Proceedings of the National Academy of*  
611 *Sciences of the United States of America* *100*, 14145-14150. [10.1073/pnas.2334336100](https://doi.org/10.1073/pnas.2334336100).
- 612 47. Mandikian, D., Takahashi, N., Lo, A.A., Li, J., Eastham-Anderson, J., Slaga, D., Ho, J.,  
613 Hristopoulos, M., Clark, R., Totpal, K., Lin, K., et al. (2018). Relative Target Affinities of T-Cell-  
614 Dependent Bispecific Antibodies Determine Biodistribution in a Solid Tumor Mouse Model.  
615 *Molecular cancer therapeutics* *17*, 776-785. [10.1158/1535-7163.MCT-17-0657](https://doi.org/10.1158/1535-7163.MCT-17-0657).
- 616 48. Damato, B.E., Dukes, J., Goodall, H., and Carvajal, R.D. (2019). Tebentafusp: T Cell  
617 Redirection for the Treatment of Metastatic Uveal Melanoma. *Cancers* *11*.  
618 [10.3390/cancers11070971](https://doi.org/10.3390/cancers11070971).
- 619 49. Lum, L.G., and Thakur, A. (2011). Targeting T cells with bispecific antibodies for cancer  
620 therapy. *BioDrugs : clinical immunotherapeutics, biopharmaceuticals and gene therapy* *25*,  
621 365-379. [10.2165/11595950-000000000-00000](https://doi.org/10.2165/11595950-000000000-00000).
- 622 50. Middleton, M.R., McAlpine, C., Woodcock, V.K., Corrie, P., Infante, J.R., Steven, N.M., Evans,  
623 T.R.J., Anthoney, A., Shoushtari, A.N., Hamid, O., Gupta, A., et al. (2020). Tebentafusp, A  
624 TCR/Anti-CD3 Bispecific Fusion Protein Targeting gp100, Potently Activated Antitumor  
625 Immune Responses in Patients with Metastatic Melanoma. *Clinical cancer research : an*  
626 *official journal of the American Association for Cancer Research* *26*, 5869-5878.  
627 [10.1158/1078-0432.CCR-20-1247](https://doi.org/10.1158/1078-0432.CCR-20-1247).
- 628 51. Strohl, W.R., and Naso, M. (2019). Bispecific T-Cell Redirection versus Chimeric Antigen  
629 Receptor (CAR)-T Cells as Approaches to Kill Cancer Cells. *Antibodies* *8*.  
630 [10.3390/antib8030041](https://doi.org/10.3390/antib8030041).
- 631 52. Boulter, J.M., Glick, M., Todorov, P.T., Baston, E., Sami, M., Rizkallah, P., and Jakobsen, B.K.  
632 (2003). Stable, soluble T-cell receptor molecules for crystallization and therapeutics. *Protein*  
633 *engineering* *16*, 707-711. [10.1093/protein/gzg087](https://doi.org/10.1093/protein/gzg087).
- 634 53. Garboczi, D.N., Hung, D.T., and Wiley, D.C. (1992). HLA-A2-peptide complexes: refolding and  
635 crystallization of molecules expressed in *Escherichia coli* and complexed with single antigenic  
636 peptides. *Proceedings of the National Academy of Sciences of the United States of America*  
637 *89*, 3429-3433. [10.1073/pnas.89.8.3429](https://doi.org/10.1073/pnas.89.8.3429).
- 638 54. Sunnaker, M., Busetto, A.G., Numminen, E., Corander, J., Foll, M., and Dessimoz, C. (2013).  
639 Approximate Bayesian computation. *PLoS computational biology* *9*, e1002803.  
640 [10.1371/journal.pcbi.1002803](https://doi.org/10.1371/journal.pcbi.1002803).
- 641 55. Toni, T., Welch, D., Strelkowa, N., Ipsen, A., and Stumpf, M.P. (2009). Approximate Bayesian  
642 computation scheme for parameter inference and model selection in dynamical systems.  
643 *Journal of the Royal Society, Interface* *6*, 187-202. [10.1098/rsif.2008.0172](https://doi.org/10.1098/rsif.2008.0172).

644

645





A

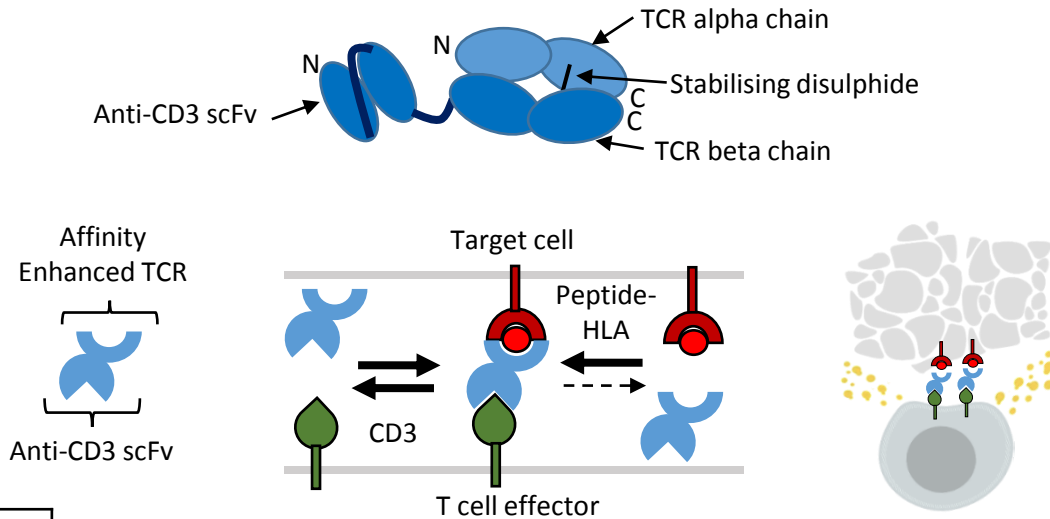

B

|     | $K_D$<br>(nM) | $t_{1/2}$<br>(min) |
|-----|---------------|--------------------|
| E8  | 615           | 0.6                |
| E39 | 607           | 0.2                |
| E2  | 144           | 1.2                |
| E31 | 90            | 1.4                |
| E28 | 36            | 4.6                |
| E0  | 34            | 7.6                |
| E16 | 5.9           | 14.2               |
| E17 | 2.3           | 31                 |
| E24 | 0.52          | 128                |
| E42 | 0.25          | 232                |

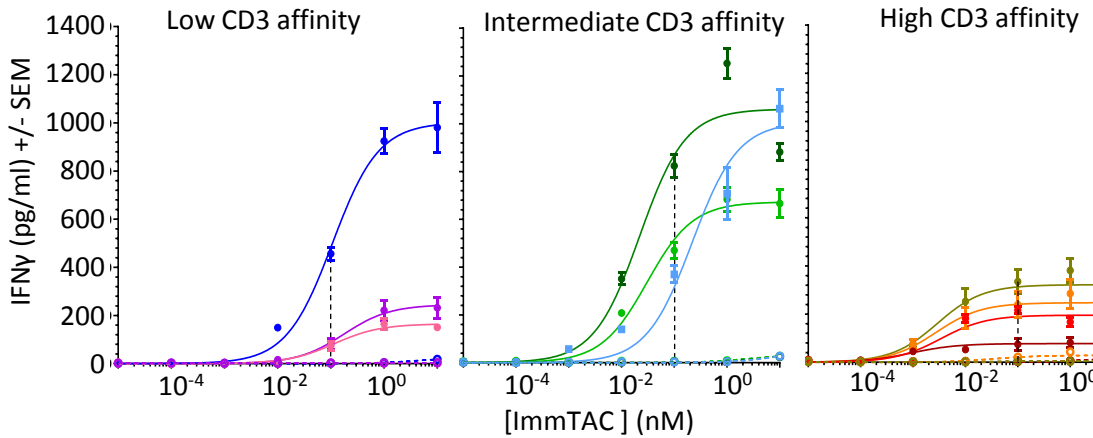

C

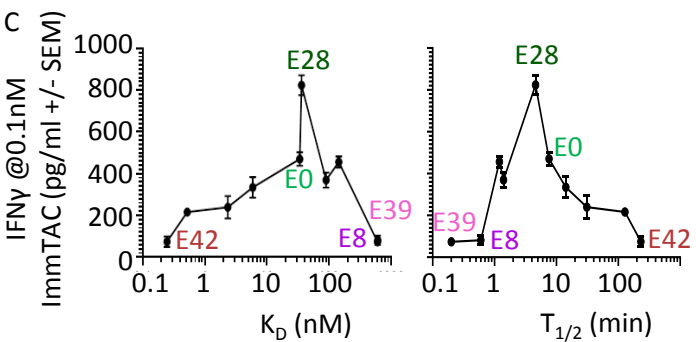

D

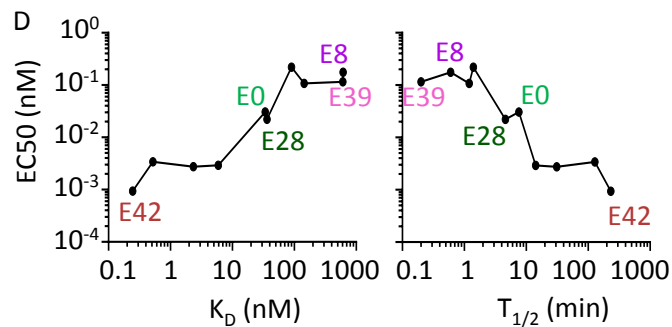

**Figure 1 – Effect of CD3 affinity on ImmTAC activity with a highly specific TCR (NY-BR-1).** **A)** Summary of the basic structure of an ImmTAC molecule (top) and the general mechanism of action (below): An affinity matured TCR linked to an anti-CD3 scFv, forms bridges between effector T cells and target cells through strong binding to peptide-HLA with slow dissociation rates and intermediate binding affinity to CD3. This allows activation and redirection of T cells to specifically kill target cells. **B)** IFN $\gamma$  ELISA of response of HLA-A\*02:01 negative PBMCs in the presence of ImmTAC molecules and T2 cells pulsed with 5 nM Target peptide (solid lines and full circles), or without pulsed peptide (dotted lines and open circles). Three plots are shown for low, medium and high affinity anti-CD3 variants. Data points represent the mean of 8 different wells measured from a 384 well format plate. Black dashed line highlights the 0.1nM ImmTAC concentration used for summary plots of ELISA response efficacy shown in **C)** while potency (EC50) is shown in **D)**. Both are plotted against CD3 affinity (left) or  $t_{1/2}$  (right) of CD3 binding.

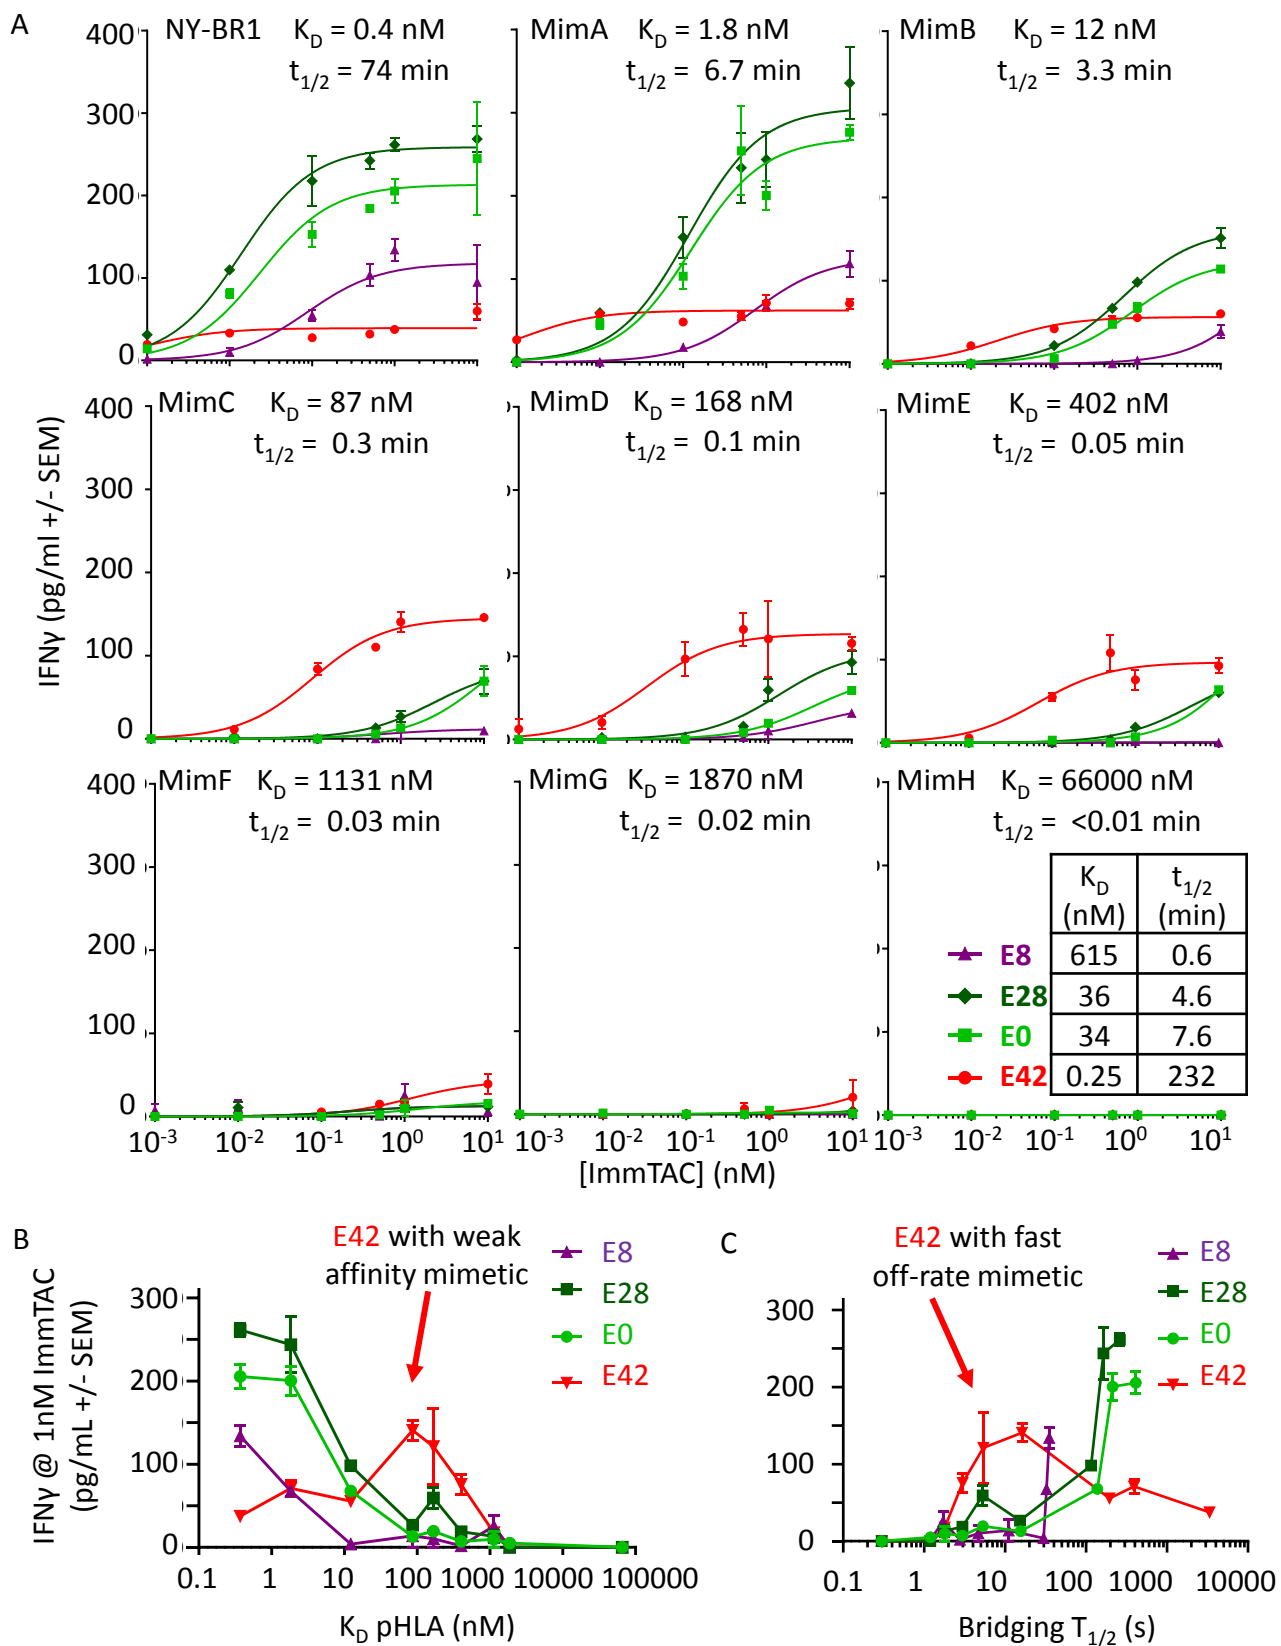

**Figure 2 – Effect of different combinations of TCR affinity and anti-CD3 affinity: A)** NY-BR-1 target peptide and a range of its mimetics were added to 50,000 T2 cells at a concentration of 5 nM, (37 °C affinities of each peptide HLA for TCR shown in the figure). Four ImmTAC molecules with E8, E28, E0, and E42 anti CD3 arms, were added at varying concentrations along with 40,000 PBMC cells. IFN $\gamma$  was then measured by ELISA after a 48 hr incubation in a 96 well format. **B)** Summary plot of ELISA data showing response to 1 nM ImmTAC plotted against TCR binding affinity to the different mimetic peptides. **C)** Summary plot of ELISA data showing response to 1 nM ImmTAC plotted against the combined dissociation rate of TCR and anti-CD3 (i.e. the estimated  $T_{1/2}$  of a cell-cell bridge).

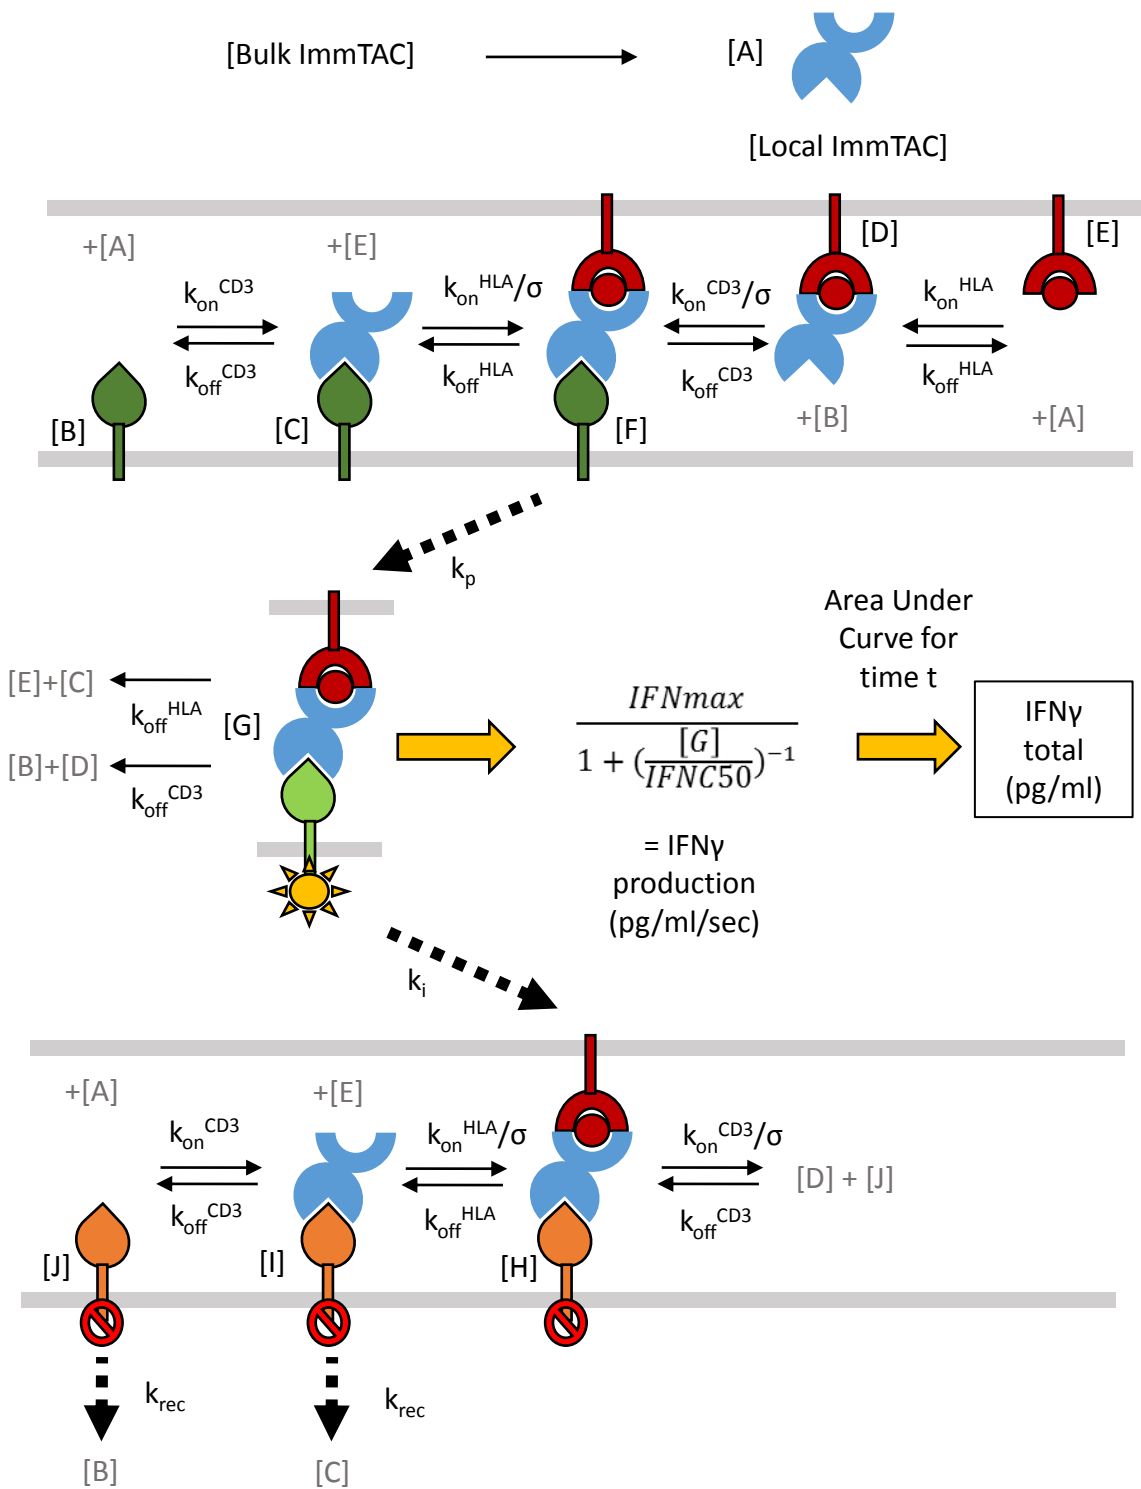

**Figure 3 – Structure of mathematical model for T cell activation.** Ten local concentrations (A-J) were modelled using ten ordinary differential equations and these concentrations and their relationships are summarised here. Cell membranes are represented as grey lines, ImmTAC is shown in blue, peptide HLA in dark red, resting CD3 in dark green, activated CD3 in light green, and inhibited 'dark state' CD3 in orange. Relevant rate parameters are shown above reaction arrows and letters in grey denote involvement of other model components, (each component is only shown here once for simplicity). Concentration of active CD3 was translated into a rate of IFN $\gamma$  production per second following a simple 3 parameter dose-response relationship, then the area under the curve fitted for total IFN $\gamma$  production over the course of the experiment. The local free ImmTAC concentration (A) was replenished by rapid diffusion from an inexhaustible bulk solution.

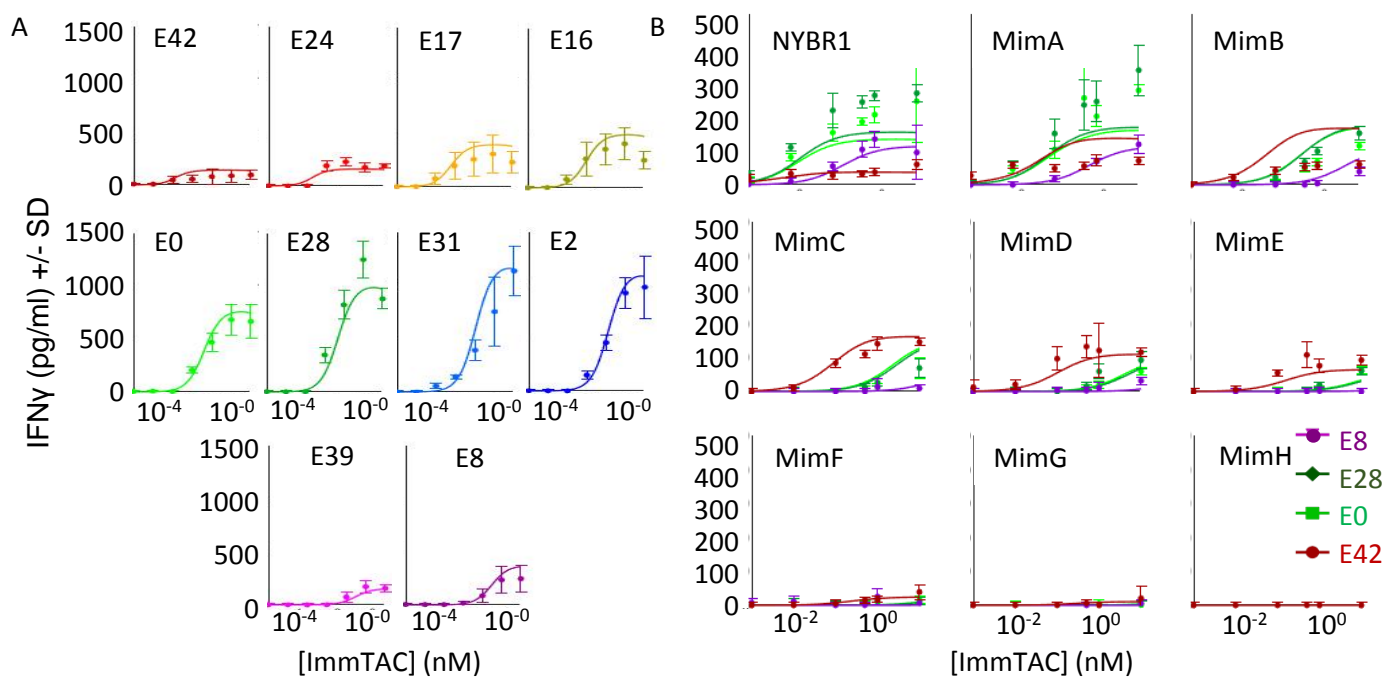

**Figure 4 – Model fitting results compared to the data.** Fits of mathematical models applied to two data sets from Figures 1 and 2. Simulated data shown here as solid lines generated using ‘best particle’ values for final iteration of ABC-SMC runs (Table S4). **A)** Fit to ELISA data from Figure 1B generated with T2 cells pulsed with 5nM target peptide and 10 different anti-CD3 variants. Error bars represent standard deviation from 8 data points. Parameter values used in fit shown in Table S4 **B)** Fit to ELISA data from Figure 2 generated with four anti-CD3 variants on T2 cells pulsed nine different peptides at 5 nM. Error bars represent standard deviation over 3 data points. Parameter values used in fit shown in Supplementary Figure S2 and Table S4.

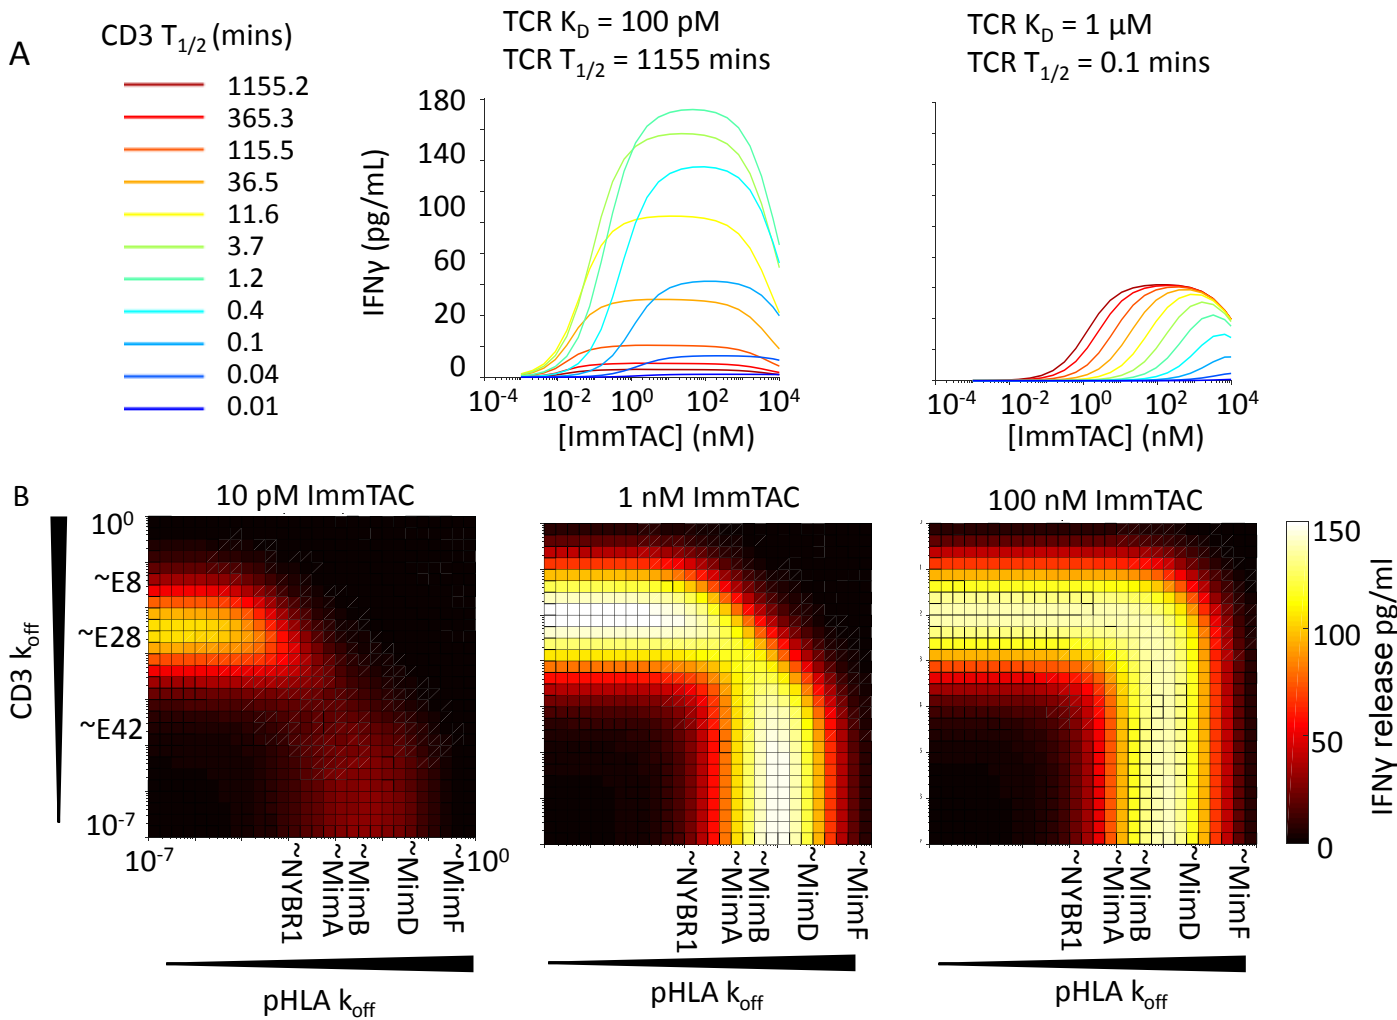

**Figure 5 – Implications of mathematical model for ImmTAC potency and efficacy. A)** Effect of varying CD3  $T_{1/2}$  with fixed  $k_{on}$  and long lived TCR-pHLA binding ( $T_{1/2} = 1155$  mins) left, or short lived TCR-pHLA binding ( $T_{1/2} = 0.1$  mins) right. **B)** Heat maps plotting predicted IFN $\gamma$  responses with different CD3-HLA affinity combinations at various ImmTAC concentrations (as written above each heat map). Off-rates of anti-CD3 variants and TCR binding mimetics marked on axes for reference, although their on-rates also vary.

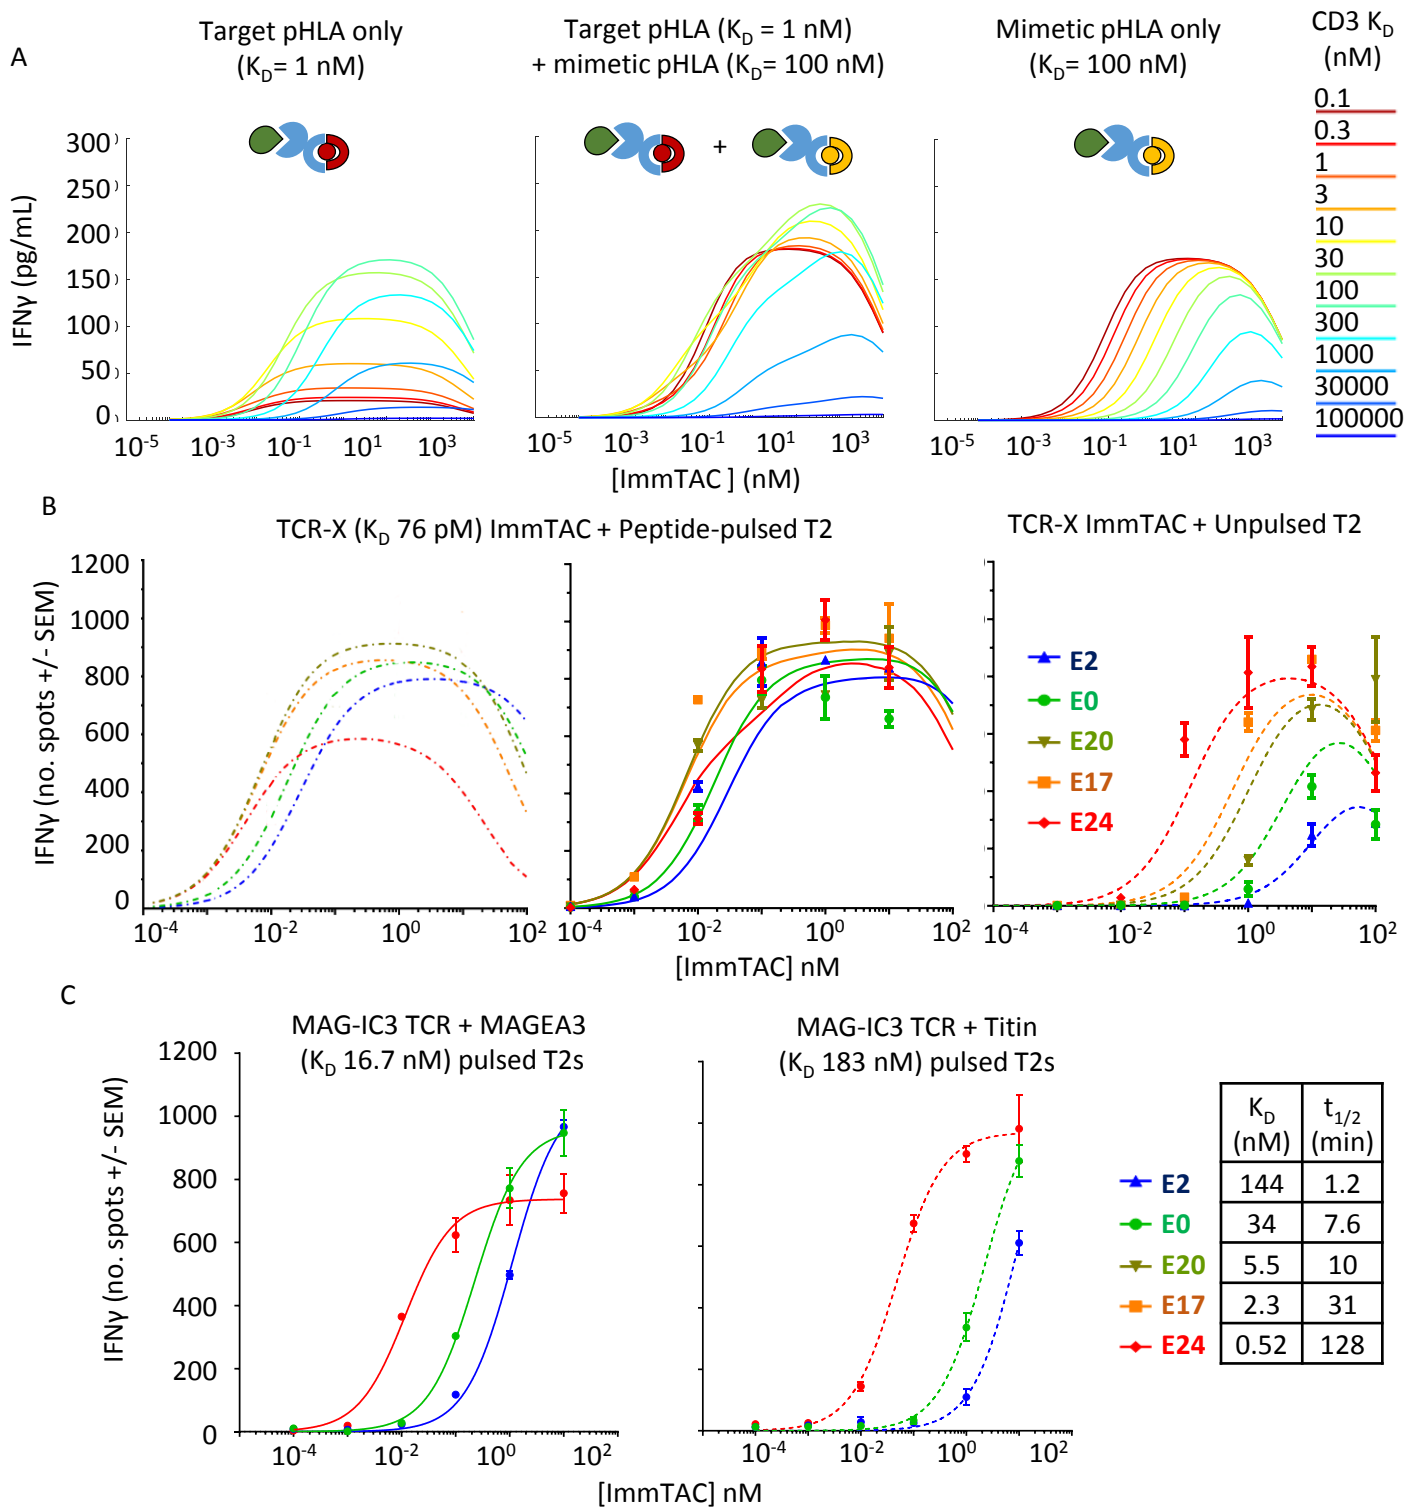

**Figure 6 – Effect of CD3 affinity on ImmTAC therapeutic window. A)** Modelling of IFN $\gamma$  response to two different HLA molecules (target and mimetic) was run with parameters fitted to NY-BR-1 data and an expanded 15 ODE model. Left: With only 1 nM target pHLA present, Middle: both 1 nM affinity target and 100 nM affinity mimetic pHLA molecules present, or right: only mimetic 100 nM affinity pHLA modelled. (The same presentation level of peptides used in both instances and on rate was kept constant at  $0.1 \mu\text{M}^{-1} \text{s}^{-1}$ ). **B)** Modelling and data for IFN $\gamma$  production from PBMCs in the presence of cross-reactive TCR-X ImmTAC and T2 cells pulsed with 5 nM Target peptide (left two graphs), or unpulsed cells (right). Lines show fits generated by the ODE model, without (left) or with (middle and right) fitted mimetic included in the model, and dots show ELISpot data points. Parameters of fit are shown in Figure S4. **C)** ELISpot data with MAG-IC3 ImmTAC and HLA-A1 transfected T2 cells pulsed with the MAGEA3 target peptide that binds the TCR with a  $K_D$  of 17 nM (left), or the mimetic Titin that binds the TCR with a  $K_D$  of 180 nM (right), ( $2.5 \mu\text{M}$  peptide pulse used in both instances). Curves represent 3-parameter fits. (Modelling was not performed for this TCR as data on peptide presentation level were not available)

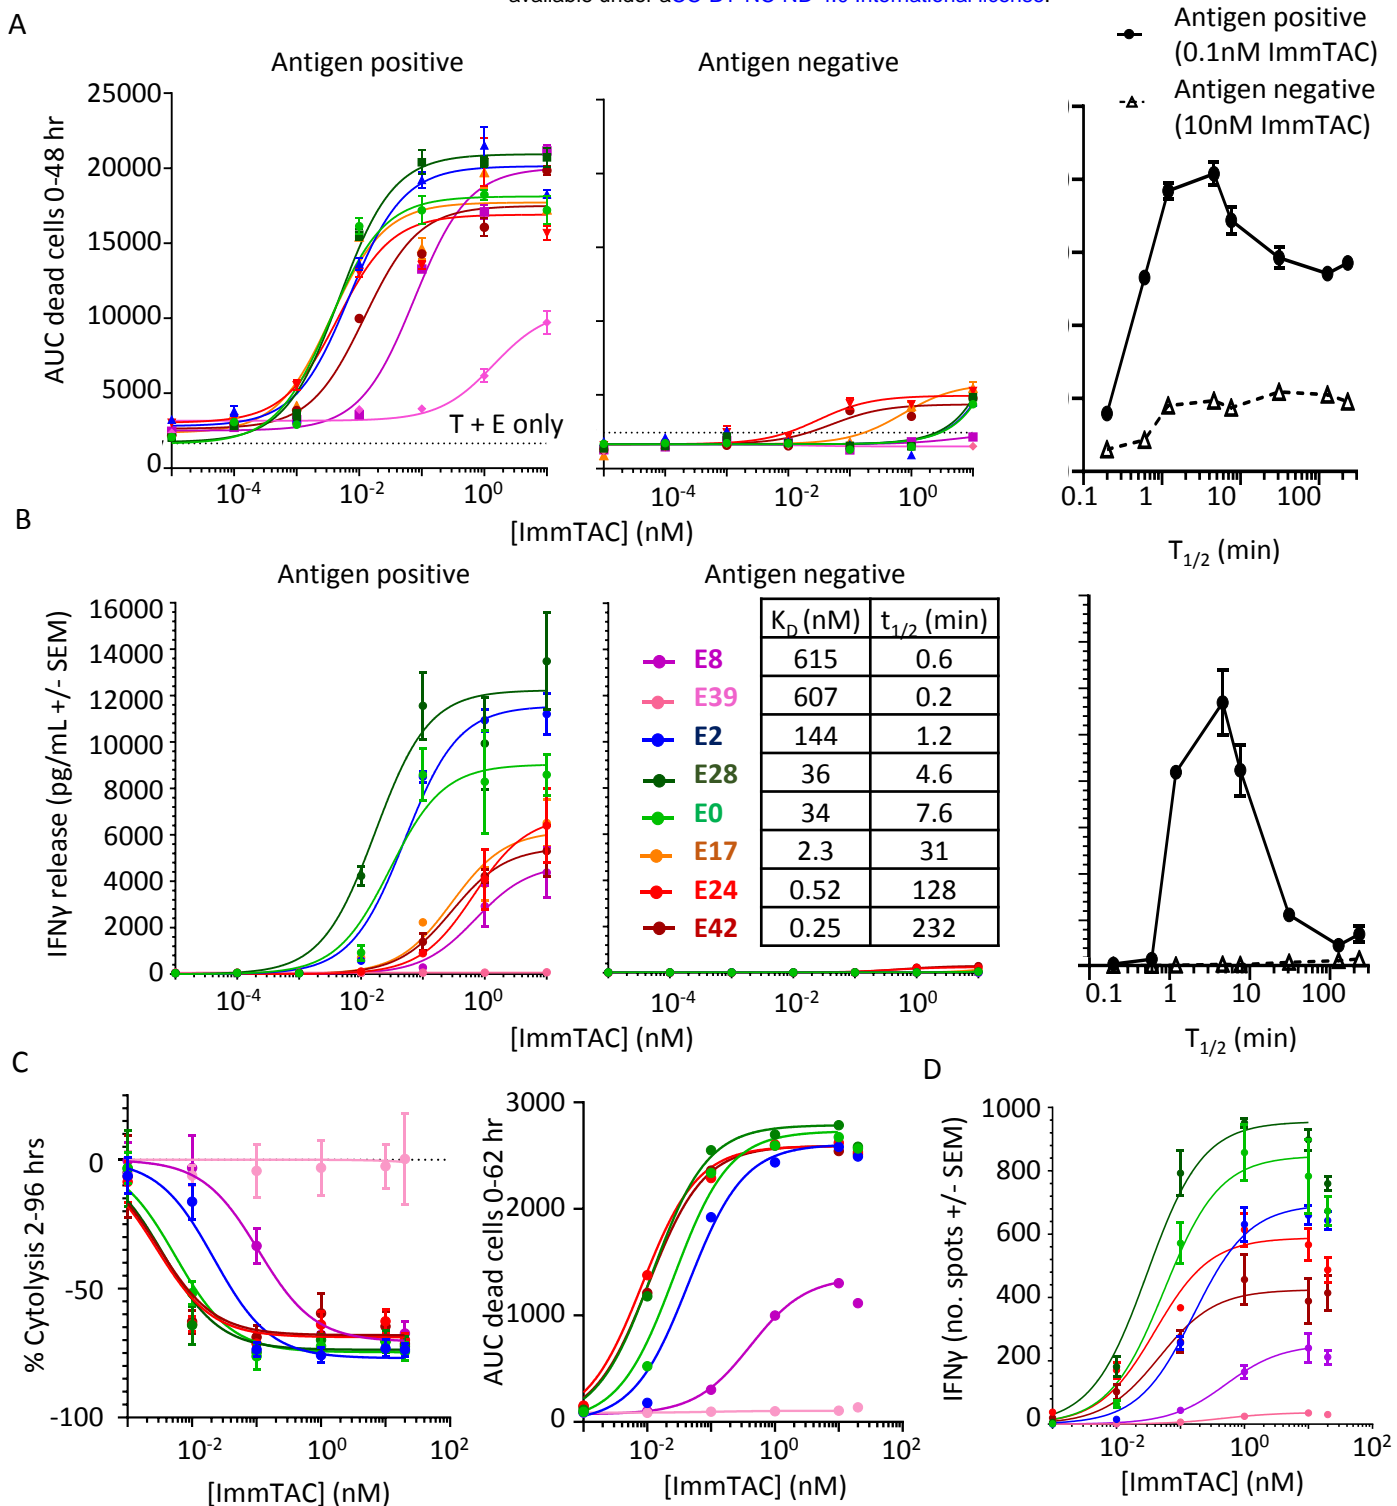

**Figure 7. Comparison of cytotoxicity to cytokine release** **A)** Killing of antigen positive cells (left) and antigen negative cells (middle) with different CD3 affinity molecules as measured by an Incucyte assay. Area under the curve (AUC) of dead target cell counts at specified ImmTAC concentration. The plot on the right shows AUC vs  $t_{1/2}$  of CD3 binding at a singular ImmTAC concentration. Detailed time courses from which these data are derived are shown in Figure S6 **B)** Plot of IFN $\gamma$  in media at the end of killing experiment measured by ELISA with antigen positive cells (left) and antigen negative cells (middle). **C)** Shows results from an alternative killing assay setup utilising Phenix instrument using CAMA1 antigen positive cells, but a different PBMC donor with a 4:1 ratio of effectors to targets. The left panel shows the percentage of surviving cells after 96 hrs relative to a control incubation without ImmTAC and normalised to initial cell counts at 2hrs (Detailed time courses shown in Figure S6), while the right panel uses data from counting dead cells and estimating the area under the curve in the first 62 hours of the experiment. **D)** ELISpot data collected with CAMA1 cells and the same PBMC donor as C, but with a 1:1 Effector to Target ratio.

Graphical abstract

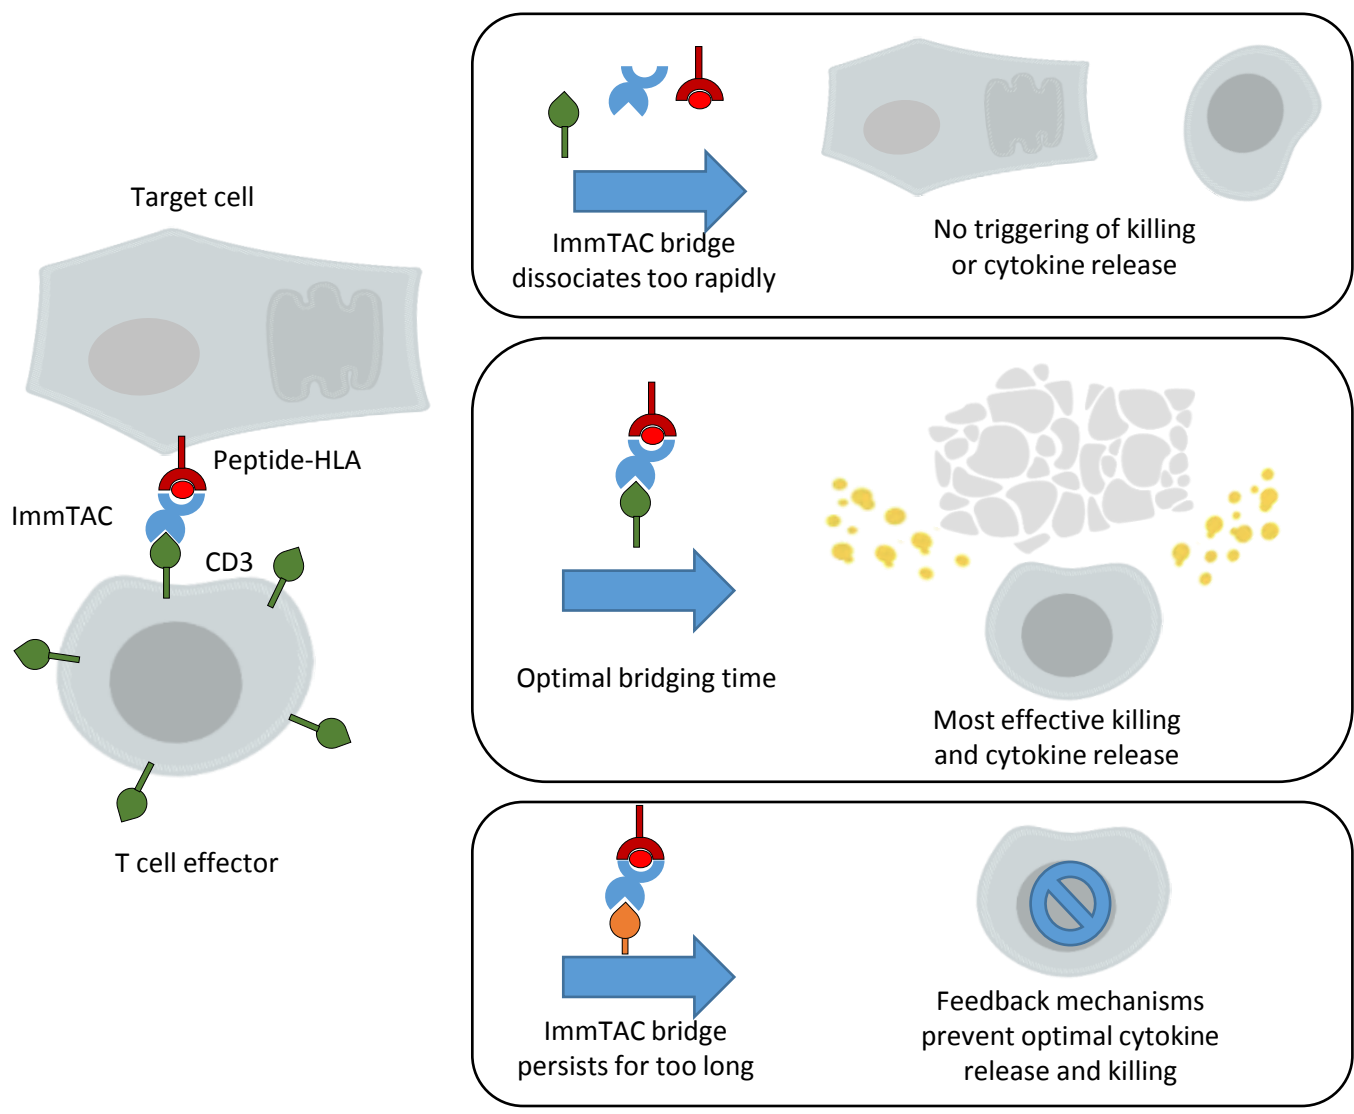

Source: https://www.biorxiv.org/content/10.1101/2022.11.03.511676v1.full.pdf
